# Supplementary material for: Genetic dissection of the Arabidopsis spaceflight transcriptome: Are some responses dispensable for the physiological adaptation of plants to spaceflight?
Source: PLoS One. 2017 Jun 29;12(6):e0180186. doi: 10.1371/journal.pone.0180186 (PMC5491145; doi:10.1371/journal.pone.0180186)
Supplement: S8 Table — Abbreviations: GC-Ground Control, FLT-Flight, LT-Light, DK-Dark (XLSX) [file pone.0180186.s008.xlsx]

## Sheet: Sheet1
LIGHT		log2 (fold change)					DARK		log2 (fold change)					LIGHT		log2 (fold change)					DARK		log2 (fold change)
gene_id	gene	GC LT WS compared to GC LT Col-0	FLT LT Col-0 compared to GC LT Col-0	FLT LT WS compared to GC LT WS	FLT LT WS compared to FLT LT Col-0		gene_id	gene	GC DK WS compared to GC DK Col-0	FLT DK Col0 compared to GC DK Col0	FLT DK WS compared to GC DK WS	FLT DK WS compared to FLT DK Col-0		gene_id	gene	GC LT PhyD compared to GC LT Col-0	FLT LT PhyD compared to GC LT PhyD	FLT LT Col compared to GC LT Col-0	FLT LT PhyD compared to FLT LT Col-0		gene_id	gene	GC DK PhyD compared to GC DK Col-0	FLT DK PhyD compared to GC DK PhyD	FLT DK Col-0 compared to GC DK Col-0	FLT DK PhyD compared to FLT DK Col-0
XLOC_015571	AT3G24255	7.08093			7.58376		XLOC_015571	AT3G24255	6.80581			7.34101		XLOC_010214	AT2G28210	3.58286			1.59308		XLOC_007669	AT1G66200	1.63813			1.42059
XLOC_016495	AT3G44790,AT3G44800	5.80621			5.23346		XLOC_021144	AT4G01525.1	3.98982			3.07836		XLOC_010633	AT2G35380	2.13635			1.47286		XLOC_027967	AT5G33355	5.66014	-3.54487
XLOC_024630	AT4G13560	5.52753			3.81767		XLOC_016401	AT3G43670	3.94666			3.8471		XLOC_024612	AT4G13300	1.72919			1.02024		XLOC_032983	AT5G54100	2.14745	-1.83709
XLOC_031950	AT5G36925	4.52259			3.11587		XLOC_010955	AT2G40960	3.00213			3.12347		XLOC_015307	AT3G20380	1.45944			1.38721		XLOC_018832	AT3G22600	1.74562	-1.89693
XLOC_007901	AT1G70080	4.16646			2.25759		XLOC_011572	AT2G04230	2.78954			3.34244		XLOC_003581	AT1G67148	1.39979			1.00263		XLOC_026714	AT5G09440	1.60016	-2.12466
XLOC_016482	AT3G44716	4.10824			5.24343		XLOC_012223	AT2G15560,AT2G15570	2.68618			2.87213		XLOC_022501	AT4G20390	3.07897	-2.05258				XLOC_005970	AT1G30750,AT1G30755	1.56711	-1.79359
XLOC_022746	AT4G24420	3.9747			4.20907		XLOC_027753	AT5G28626.1	2.65166			3.12784		XLOC_012837	AT2G25735	2.58292	-1.65651				XLOC_030482	AT5G10130	1.52509	-1.87122
XLOC_010955	AT2G40960	3.83103			3.6855		XLOC_000507	AT1G10300	2.41513			2.72082		XLOC_017165	AT3G55980	1.84104	-1.53233				XLOC_012934	AT2G27370	1.51161	-1.75196
XLOC_001910	AT1G34180	3.15555			1.88632		XLOC_007901	AT1G70080	2.09442			3.2785		XLOC_025467	AT4G27280	1.27108	-1.43152				XLOC_021184	AT4G02090	1.48046	-1.68601
XLOC_022306	AT4G16980	3.1436			6.82918		XLOC_031214	AT5G24060	2.07443			2.09406		XLOC_017250	AT3G57450	1.26378	-1.18133				XLOC_022326	AT4G17340	1.44665	-1.82767
XLOC_021144	AT4G01525.1	3.1407			2.69786		XLOC_003403	AT1G64100,AT1G64105	1.98			1.45897		XLOC_014694	AT3G10340	1.05789	-1.59049				XLOC_030680	AT5G13870	1.42398	-1.84651
XLOC_031890	AT5G36240	2.97035			4.07739		XLOC_029963	AT5G66815	1.97066			4.80963		XLOC_013889	AT2G43590	-2.05623	1.57032				XLOC_024571	AT4G12880	1.36823	-1.39798
XLOC_026569	AT5G06390	2.96347			2.26237		XLOC_027431	AT5G23570	1.85682			1.80977		XLOC_024876	AT4G17030	2.77426		3.40081			XLOC_000914	AT1G17180	1.34172	-1.73094
XLOC_006804	AT1G50290,AT1G50300	2.80095			3.64221		XLOC_026569	AT5G06390	1.85288			2.48997		XLOC_031850	AT5G35735	2.56134		1.95479			XLOC_027445	AT5G23840	1.22325	-2.46217
XLOC_003582	AT1G67150	2.73462			3.08379		XLOC_020422	AT3G53730	1.80882			1.49114		XLOC_017389	AT3G60140	1.90096		1.87045			XLOC_010451	AT2G32300	1.10933	-1.64114
XLOC_027753	AT5G28626.1	2.56818			2.70772		XLOC_022623	AT4G22212	1.69486			2.83041		XLOC_026758	AT5G10210	1.82904		1.67001			XLOC_024550	AT4G12510	1.08688	-2.5624
XLOC_009310	AT2G13665	2.52818			2.75462		XLOC_014607	AT3G08890	1.60412			1.4652		XLOC_009896	AT2G22860	1.81013		1.55672			XLOC_013095	AT2G30210	1.06497	-1.59472
XLOC_012223	AT2G15560,AT2G15570	2.42561			3.12193		XLOC_004526	AT1G04280	1.57587			1.3092		XLOC_005426	AT1G20160	1.59836		1.4848			XLOC_024551	AT4G12520	1.0348	-1.53393
XLOC_011572	AT2G04230	2.41808			1.92785		XLOC_006804	AT1G50290,AT1G50300	1.52225			2.47593		XLOC_023713	AT4G01250	1.51729		1.45699			XLOC_015006	AT3G15450	-1.07222	1.39699
XLOC_027431	AT5G23570	2.30314			2.19304		XLOC_006014	AT1G31340	1.50835			1.38686		XLOC_019066	AT3G26510	1.47629		1.03596			XLOC_006573	AT1G44180	-1.08508	1.92867
XLOC_004240	AT1G78850,AT1G78860	2.21476			1.30294		XLOC_010017	AT2G24762	1.42789			2.1462		XLOC_020569	AT3G56400	1.33975		1.91129			XLOC_010094	AT2G25900	-1.16165	1.32425
XLOC_016598	AT3G46480	2.13479			2.48334		XLOC_024858	AT4G16770	1.35105			2.17414		XLOC_001031	AT1G19180	1.21549		1.32268			XLOC_009700	AT2G19810	-1.21128	2.03828
XLOC_019165	AT3G27884	2.10533			2.10091		XLOC_017935	AT3G06680	1.21039			1.11364		XLOC_015792	AT3G28050	-1.65638		-2.07962			XLOC_010796	AT2G38230	-1.72533	2.76465
XLOC_010443	AT2G32190	1.8956			1.37365		XLOC_001724	AT1G31150	1.17136			1.22021		XLOC_001146	AT1G21140	-2.17574		-2.93216			XLOC_000811	AT1G15330	-1.81595	2.76474
XLOC_024858	AT4G16770	1.88118			2.07541		XLOC_031055	AT5G20620	1.07677			1.30027		XLOC_030225	AT5G04950	-2.30618		-3.61546			XLOC_008574	AT2G01520	-1.86601	2.19124
XLOC_032189	AT5G40590	1.8458			2.2743		XLOC_017588	AT3G01260	1.00238			2.31974		XLOC_022624	AT4G22214	-3.47452		-3.18719			XLOC_009608	AT2G18370	-2.50936	3.81375
XLOC_020121	AT3G48700	1.84381			1.38186		XLOC_025933	AT4G35750	-1.00267			-1.19091		XLOC_010807	AT2G38400	1.12313					XLOC_014882	AT3G13650	2.76128		1.78622
XLOC_022623	AT4G22212	1.80922			2.48399		XLOC_022288	AT4G16710	-1.00945			-1.44072		XLOC_000120	AT1G03090	1.21507					XLOC_011345	AT2G47540	2.38922		3.69313
XLOC_009636	AT2G18800	1.79308			1.29607		XLOC_014731	AT3G10985	-1.01393			-1.41387		XLOC_015676	AT3G26100	1.23145					XLOC_029850	AT5G64890	2.04735		2.00837
XLOC_006651	-	1.74933			1.75126		XLOC_014944	AT3G14595	-1.01582			-1.05853		XLOC_004118	AT1G76590	1.25083					XLOC_003590	AT1G67330	1.83791		1.81594
XLOC_028683	AT5G44582	1.72025			1.02904		XLOC_001407	AT1G26470	-1.07121			-1.2209		XLOC_029195	AT5G53450	1.31182					XLOC_032189	AT5G40590	1.82704		2.24701
XLOC_007666	AT1G66173	1.60709			2.82499		XLOC_021399	AT4G04830	-1.08047			-1.0543		XLOC_012918	AT2G27140	1.33952					XLOC_022648	AT4G22666	1.77597		2.33093
XLOC_010660	AT2G35810	1.53538			1.83311		XLOC_024664	AT4G14030,AT4G14040	-1.10763			-1.57325		XLOC_012078	AT2G13360	1.35346					XLOC_002603	AT1G50060	1.72866		2.07067
XLOC_003403	AT1G64100,AT1G64105	1.5346			1.76442		XLOC_006573	AT1G44180	-1.17553			-1.07593		XLOC_023208	AT4G32480	1.40727					XLOC_004454	AT1G02900	1.71487		1.15431
XLOC_020040	AT3G47300	1.52635			2.16035		XLOC_031526	AT5G28770	-1.18532			-1.0285		XLOC_033692	AT5G66650	1.52081					XLOC_015307	AT3G20380	1.55961		1.2608
XLOC_003576	AT1G67105	1.52191			1.84303		XLOC_030813	AT5G16370	-1.19921			-1.38532		XLOC_029266	AT5G54490	1.61408					XLOC_017584	AT3G01190	1.44139		1.46722
XLOC_000560	AT1G11185	1.50234			1.38789		XLOC_005870	AT1G28580	-1.2272			-1.14916		XLOC_013740	AT2G41010	1.7329					XLOC_023103	AT4G30650	1.39517		2.09266
XLOC_009026	AT2G07708	1.45068			1.23233		XLOC_026565	AT5G06340	-1.31674			-1.11183		XLOC_010158	AT2G27080	1.81702					XLOC_025630	AT4G30280	1.34894		1.3642
XLOC_028152	AT5G35935.1	1.33421			1.7356		XLOC_006033	AT1G31600	-1.31774			-1.57522		XLOC_017976	AT3G07420	1.8792					XLOC_013647	AT2G39530	1.32993		1.4316
XLOC_018437	AT3G15353	1.33278			1.40052		XLOC_027142	AT5G17870	-1.36891			-1.45517		XLOC_021637	AT4G07820	2.31243					XLOC_001454	AT1G27030	1.28333		1.33165
XLOC_030073	AT5G02150	1.29985			1.5271		XLOC_016721	AT3G48380	-1.38676			-1.36391		XLOC_009339	AT2G14210	2.51106					XLOC_002025	AT1G35720	1.27037		1.4938
XLOC_008608	AT2G02100	1.2493			1.63765		XLOC_026906	AT5G13490	-1.41201			-2.46801		XLOC_005506	AT1G21520	2.70367					XLOC_008219	AT1G76240	1.08369		1.1648
XLOC_031055	AT5G20620	1.19834			1.23029		XLOC_007202	AT1G57860	-1.41419			-1.75231		XLOC_017699	AT3G03130	-1.66286					XLOC_018238	AT3G12230,AT3G12240	1.08277		1.65516
XLOC_017590	AT3G01290	1.16011			1.2541		XLOC_027339	AT5G21170	-1.42841			-1.08525		XLOC_015055	AT3G16240	-1.27733					XLOC_012428	AT2G18980	1.06326		1.20527
XLOC_004526	AT1G04280	1.13374			1.1915		XLOC_019307	AT3G29575	-1.46256			-1.63845		XLOC_020553	AT3G56090	-1.24182					XLOC_018871	AT3G23175	1.0117		1.77158
XLOC_024319	AT4G08770	1.09695			1.15307		XLOC_009823	AT2G21850	-1.49525			-1.60652		XLOC_003725	AT1G69530	-1.23782					XLOC_012918	AT2G27140	-1.06344		-1.45474
XLOC_028684	AT5G44585,AT5G44590	1.09417			1.0324		XLOC_016310	AT3G42806.1	-1.50878			-2.50436		XLOC_008130	AT1G74500	-1.19877					XLOC_025804	AT4G33260,AT4G33270	-1.23004		-1.14222
XLOC_006014	AT1G31340	1.07619			1.64559		XLOC_001667	AT1G30360	-1.52958			-1.4116		XLOC_032355	AT5G43350				1.00222		XLOC_017637	AT3G02000	-1.87631		-1.38851
XLOC_004525	AT1G04270	1.0311			1.07979		XLOC_019246	AT3G28940	-1.54197			-1.35233		XLOC_029411	AT5G56870				1.01979		XLOC_004852	AT1G09932	1.00542
XLOC_015474	AT3G22890	-1.00065			-1.08049		XLOC_008020	AT1G72490	-1.54706			-1.49456		XLOC_030071	AT5G02090				1.03065		XLOC_033344	AT5G60660	1.02851
XLOC_016721	AT3G48380	-1.0644			-1.44049		XLOC_001112	AT1G20620,AT1G20630	-1.55385			-1.72495		XLOC_027391	AT5G22920				1.0322		XLOC_011743	AT2G06925	1.05579
XLOC_000914	AT1G17180	-1.09108			-1.60025		XLOC_026068	AT4G38060	-1.57488			-1.2867		XLOC_033509	AT5G63595,AT5G63600				1.03561		XLOC_000234	AT1G05260	1.06055
XLOC_012078	AT2G13360	-1.12606			-1.29557		XLOC_018383	AT3G14362	-1.61862			-1.55377		XLOC_028572	AT5G42825				1.04052		XLOC_012252	AT2G16060	1.11171
XLOC_018470	AT3G15950	-1.18994			-2.23554		XLOC_010796	AT2G38230	-1.68566			-1.83348		XLOC_014257	AT3G02240				1.04071		XLOC_003355	AT1G63220	1.12209
XLOC_002878	AT1G54890	-1.22562			-1.55296		XLOC_010049	AT2G25250	-1.71579			-1.18303		XLOC_011743	AT2G06925				1.04736		XLOC_021137	AT4G01480	1.13635
XLOC_010869	AT2G39570,AT2G39580	-1.32021			-1.04082		XLOC_009781	AT2G21045	-1.82583			-2.56485		XLOC_027641	AT5G27350				1.05397		XLOC_015449	AT3G22370	1.14406
XLOC_023619	AT4G39955	-1.32056			-1.05308		XLOC_009700	AT2G19810	-1.83729			-1.31488		XLOC_014731	AT3G10985				1.06222		XLOC_032539	AT5G46230	1.21974
XLOC_012848	AT2G25980	-1.35939			-2.00555		XLOC_015850	AT3G28910	-1.83936			-1.5801		XLOC_017472	AT3G61470				1.07725		XLOC_003261	AT1G61795	1.24942
XLOC_028473	AT5G41600	-1.50741			-1.02788		XLOC_009602	AT2G18280	-1.86711			-1.44706		XLOC_032851	AT5G51580				1.08376		XLOC_018814	AT3G22235,AT3G22240	1.25449
XLOC_004380	AT1G01470	-1.58083			-1.30964		XLOC_024764	AT4G15340	-2.01217			-1.6368		XLOC_006912	AT1G52200				1.10564		XLOC_016797	AT3G49845	1.30035
XLOC_007283	AT1G60010	-1.60345			-1.06272		XLOC_017890	AT3G05990	-2.04898			-1.14335		XLOC_014568	AT3G07720				1.10588		XLOC_033102	AT5G56350	1.31142
XLOC_018434	AT3G15340	-1.68337			-1.46204		XLOC_018809	AT3G22160	-2.05236			-1.28136		XLOC_021154	AT4G01630				1.11125		XLOC_018128	AT3G10520	1.32061
XLOC_027232	AT5G19250	-1.69212			-1.13721		XLOC_000811	AT1G15330	-2.11133			-2.06376		XLOC_018437	AT3G15353				1.1241		XLOC_029730	AT5G62720	1.3747
XLOC_012178	AT2G14878	-1.73872			-1.31668		XLOC_000638	AT1G12390	-2.12545			-2.17353		XLOC_021152	AT4G01600				1.12671		XLOC_008340	AT1G78340	1.37976
XLOC_025089	AT4G20460,AT4G20470,AT4G20480	-1.7439			-1.72969		XLOC_023531	AT4G38280,AT4G38290,AT4G38330	-2.13241			-1.87399		XLOC_010118	AT2G26355				1.13199		XLOC_005365	AT1G18980	1.40193
XLOC_007686	AT1G66500	-1.79976			-3.04321		XLOC_007890	AT1G69930	-2.19434			-1.87087		XLOC_011103	AT2G43540				1.13257		XLOC_019028	AT3G25930	1.41139
XLOC_007202	AT1G57860	-1.8074			-1.59688		XLOC_007283	AT1G60010	-2.19561			-1.36125		XLOC_003593	AT1G67365				1.16442		XLOC_025631	AT4G30290	1.43216
XLOC_027142	AT5G17870	-1.84345			-1.13642		XLOC_014793	AT3G12170	-2.24717			-1.74903		XLOC_022318	AT4G17215				1.19956		XLOC_012381	AT2G18150	1.50369
XLOC_020099	AT3G48360	-1.86973			-2.3987		XLOC_011646	AT2G05330	-2.35399			-1.53329		XLOC_026592	AT5G06839				1.25569		XLOC_032309	AT5G42785	1.51792
XLOC_021675	AT4G08035	-1.91425			-1.2979		XLOC_012381	AT2G18150	-2.48393			-3.06765		XLOC_020087	AT3G48180				1.28384		XLOC_030363	AT5G07475	1.54366
XLOC_004761	AT1G08230	-1.92404			-1.92683		XLOC_021675	AT4G08035	-2.50094			-1.69733		XLOC_016795	AT3G49780				1.29773		XLOC_026744	AT5G09978	1.55044
XLOC_000140	AT1G03430	-1.95674			-1.44858		XLOC_012178	AT2G14878	-2.50309			-2.00914		XLOC_003493	AT1G65490,AT1G65510				1.32009		XLOC_018830	AT3G22560,AT3G22570	1.5819
XLOC_033521	AT5G63760	-1.96294			-2.90682		XLOC_027232	AT5G19250	-2.51468			-2.34873		XLOC_013186	AT2G31585				1.33787		XLOC_025629	AT4G30270	1.60008
XLOC_000638	AT1G12390	-1.96699			-1.55928		XLOC_000140	AT1G03430	-2.54805			-1.63291		XLOC_018360	AT3G14060				1.37127		XLOC_009719	AT2G20142,AT2G20150	1.65239
XLOC_028792	AT5G46530	-1.99194			-1.56061		XLOC_025972	AT4G36430	-2.62575			-2.58731		XLOC_028894	AT5G48290				1.40132		XLOC_015720	AT3G26830	1.67366
XLOC_014793	AT3G12170	-2.16612			-1.86037		XLOC_033116	AT5G56550	-2.68689			-1.42348		XLOC_033683	AT5G66480,AT5G66490				1.41065		XLOC_007328	AT1G60680	1.72691
XLOC_016866	AT3G50970	-2.18168			-2.74191		XLOC_033521	AT5G63760	-2.70183			-3.03087		XLOC_025720	AT4G31875				1.42763		XLOC_030252	AT5G05340	1.75439
XLOC_004935	AT1G11280	-2.25074			-2.72405		XLOC_004935	AT1G11280	-2.71084			-2.39589		XLOC_029997	AT5G67430				1.52167		XLOC_013444	AT2G36100	1.75766
XLOC_018932	AT3G24300	-2.27239			-1.22348		XLOC_019909	AT3G45443	-2.77507			-2.31089		XLOC_023399	AT4G35770				1.53139		XLOC_026972	AT5G14730	1.78731
XLOC_019909	AT3G45443	-2.31195			-2.76593		XLOC_028792	AT5G46530	-2.9096			-1.53946		XLOC_004504	AT1G03850				1.53454		XLOC_033541	AT5G64100	1.79527
XLOC_033282	AT5G59530	-2.36705			-2.00855		XLOC_006252	AT1G35320	-2.98074			-2.93928		XLOC_001260	AT1G23120				1.53821		XLOC_003894	AT1G72330	1.80191
XLOC_008818	AT2G05380	-2.37708			-3.45721		XLOC_005614	AT1G23390	-3.00742			-1.56851		XLOC_028152	AT5G35935.1				1.54184		XLOC_023467	AT4G37030	2.00959
XLOC_028703	AT5G44910,AT5G44920	-2.46978			-1.04697		XLOC_004457	AT1G02930	-3.02211			-2.76451		XLOC_011364	AT2G47890				1.56708		XLOC_025557	AT4G28890	2.09069
XLOC_010633	AT2G35380	-2.53018			-2.16147		XLOC_004761	AT1G08230	-3.13118			-2.81898		XLOC_029850	AT5G64890				1.57583		XLOC_025196	AT4G22460	2.11492
XLOC_009781	AT2G21045	-2.53382			-1.67104		XLOC_008818	AT2G05380	-3.1923			-3.15889		XLOC_009608	AT2G18370				1.5814		XLOC_001829	AT1G32870	2.17109
XLOC_016310	AT3G42806.1	-2.65126			-2.17349		XLOC_025089	AT4G20460,AT4G20470,AT4G20480	-3.2008			-2.51982		XLOC_001693	AT1G30700				1.61679		XLOC_026288	AT5G01740	2.21286
XLOC_006252	AT1G35320	-2.75125			-2.54956		XLOC_005506	AT1G21520	-3.31983			-1.7183		XLOC_027967	AT5G33355				1.63369		XLOC_023990	AT4G05170	2.39587
XLOC_008874	AT2G06025	-2.9416			-2.79597		XLOC_008874	AT2G06025	-3.42307			-2.86859		XLOC_003801	AT1G70690				1.64089		XLOC_007697	AT1G66700	2.44548
XLOC_029412	AT5G56910	-3.1447			-1.82222		XLOC_024813	AT4G16162	-3.48107			-3.47781		XLOC_005098	AT1G14160				1.73092		XLOC_005098	AT1G14160	2.54207
XLOC_024764	AT4G15340	-3.15695			-3.01011		XLOC_020099	AT3G48360	-3.66979			-2.94756		XLOC_010069	AT2G25510				1.73514		XLOC_016864	AT3G50930	2.56315
XLOC_013889	AT2G43590	-3.15843			-2.27432		XLOC_027723	AT5G28350	-3.76335			-3.7938		XLOC_009510	AT2G16750				1.74437		XLOC_000705	AT1G13430	2.64836
XLOC_032466	AT5G45113	-3.19174			-4.07186		XLOC_010816	AT2G38530	-3.92594			-3.49191		XLOC_031115	AT5G22270				1.74937		XLOC_007139	AT1G55990	2.92933
XLOC_020935	AT3G62460	-3.95364			-3.35178		XLOC_003553	AT1G66590	-4.04427			-4.74427		XLOC_032461	AT5G45080				1.78177		XLOC_010447	AT2G32270	3.57221
XLOC_027723	AT5G28350	-4.09161			-4.24941		XLOC_014853	AT3G13240	-4.09318			-4.6192		XLOC_025022	AT4G19370				1.79714		XLOC_015493	AT3G23125	-4.72541
XLOC_003553	AT1G66590	-4.10507			-4.42815		XLOC_029412	AT5G56910	-4.18455			-2.37974		XLOC_005482	AT1G21130				1.98879		XLOC_010816	AT2G38530	-3.16757
XLOC_019352	AT3G30122	-4.29506			-6.20395		XLOC_012078	AT2G13360	-4.26537			-2.41919		XLOC_032460	AT5G45070				2.03701		XLOC_022873	AT4G26660	-1.49407
XLOC_028791	AT5G46510,AT5G46520	-4.60464			-5.52441		XLOC_002745	AT1G52618,AT1G52620	-4.60313			-4.28638		XLOC_001743	AT1G31580				2.12996		XLOC_003651	AT1G68230	-1.30707
XLOC_002745	AT1G52618,AT1G52620	-4.95427			-3.4783		XLOC_019352	AT3G30122	-4.80554			-4.52572		XLOC_032362	AT5G43450				2.13495		XLOC_004777	AT1G08560	-1.24891
XLOC_024813	AT4G16162	-5.38407			-4.7989		XLOC_015609	AT3G24890,AT3G24929,AT3G25013	-5.05892			-4.89182		XLOC_028268	AT5G38005				2.34895		XLOC_018902	AT3G23880	-1.23072
XLOC_015609	AT3G24890,AT3G24929,AT3G25013	-5.45286			-5.34634		XLOC_010633	AT2G35380	-5.30571			-3.25291		XLOC_009362	AT2G14560				2.65507		XLOC_014249	AT3G02120	-1.12486
XLOC_018059	AT3G09270	-5.51265			-7.3386		XLOC_008070	AT1G73490	-5.57266			-6.65179		XLOC_023699	AT4G01010				2.76346		XLOC_011646	AT2G05330	-1.12193
XLOC_018830	AT3G22560,AT3G22570	-5.63996			-1.44018		XLOC_017593	AT3G01311	-5.9552			-3.44158		XLOC_006904	AT1G52120				2.78998		XLOC_030966	AT5G18970,AT5G18980	-1.0657
XLOC_029087	AT5G51620	-6.48169			-6.08446		XLOC_029087	AT5G51620	-5.98148			-6.54611		XLOC_022650	AT4G22690				2.80987		XLOC_004759	AT1G08210	-1.05917
XLOC_008070	AT1G73490	-6.59818			-6.15122		XLOC_018059	AT3G09270	-6.01181			-5.95951		XLOC_007075	AT1G54950				2.91081		XLOC_018283	AT3G12970	-1.00447
XLOC_011609	AT2G04800	-7.22122			-5.98882		XLOC_009608	AT2G18370	-6.22847			-4.71153		XLOC_022652	AT4G22710				3.3275		XLOC_025345	AT4G25100				1.74093
XLOC_023145	AT4G31380	3.89843	2.98787				XLOC_012768	AT2G24755	-6.36111			-6.40347		XLOC_008199	AT1G76110				3.9207		XLOC_029959	AT5G66780				3.22056
XLOC_026844	AT5G11920	2.40015	2.96782				XLOC_007701	AT1G66783	-8.52095			-4.32361		XLOC_001074	AT1G20015				5.07931		XLOC_005418	AT1G20010				-1.40806
XLOC_010963	AT2G41100	2.39345	3.51687				XLOC_003725	AT1G69530	1.70573	2.26519				XLOC_024819	AT4G16250				-3.28292		XLOC_001053	AT1G19530		5.46309	3.43436
XLOC_010327	AT2G30140	2.02435	1.33049				XLOC_004166	AT1G77510	1.43803	1.41078				XLOC_019282	AT3G29250,AT3G29260				-2.60669		XLOC_006922	AT1G52342		3.62153	2.22066
XLOC_031070	AT5G20830	1.94934	1.77725				XLOC_018238	AT3G12230,AT3G12240	1.14412	1.65516				XLOC_012401	AT2G18450				-1.61786		XLOC_024486	AT4G11650		3.07956	2.75019
XLOC_002366	AT1G44970	1.51621	1.42915				XLOC_015306	AT3G20370	1.12999	1.1334				XLOC_013616	AT2G39040				-1.58105		XLOC_026758	AT5G10210		2.64423	2.34858
XLOC_019066	AT3G26510	1.0743	1.03596				XLOC_011570	AT2G04170	1.0012	1.58527				XLOC_007227	AT1G58270				-1.49454		XLOC_012817	AT2G25450		2.62962	2.63186
XLOC_004143	AT1G76990	-1.21926	-1.37806				XLOC_018517	AT3G16920	-1.09074	-1.31761				XLOC_013497	AT2G36885				-1.48992		XLOC_019066	AT3G26510		2.36331	1.44714
XLOC_019426	AT3G30775	-1.26011	-1.36379				XLOC_014694	AT3G10340	-1.15114	-1.55695				XLOC_016554	AT3G45700				-1.44821		XLOC_020569	AT3G56400		2.1178	1.94279
XLOC_030135	AT5G03380	-1.35913	-1.11071				XLOC_004355	AT1G01060	-1.22427	-2.59555				XLOC_022995	AT4G28720				-1.44421		XLOC_004109	AT1G76410		2.00752	1.97118
XLOC_001199	AT1G22065	-1.37759	-1.08802				XLOC_019128	AT3G27200	-1.24449	-1.04888				XLOC_022377	AT4G18280				-1.43989		XLOC_018067	AT3G09390		1.97368	2.26072
XLOC_007580	AT1G64780	-1.61598	-3.15049				XLOC_010788	AT2G38080	-1.40119	-1.44193				XLOC_028822	AT5G46890,AT5G46900				-1.43891		XLOC_029446	AT5G57625		1.83182	2.38313
XLOC_016717	AT3G48340	-1.71283	-1.81856				XLOC_030864	AT5G17300	-1.40942	-2.08464				XLOC_002603	AT1G50060				-1.37778		XLOC_017636	AT3G01970,AT3G01980		1.62333	1.08986
XLOC_010805	AT2G38380	-1.76826	-1.5717				XLOC_030821	AT5G16486,AT5G16490	-1.55391	-1.24456				XLOC_021133	AT4G01430				-1.34652		XLOC_001070	AT1G19960		1.43013	1.57344
XLOC_028592	AT5G43150	-1.79005	-1.79115				XLOC_018899	AT3G23810	-1.90068	-1.287				XLOC_023486	AT4G37410				-1.33951		XLOC_013443	AT2G36080		1.36049	1.24504
XLOC_013658	AT2G39700	-1.82993	-1.10004				XLOC_017637	AT3G02000	-2.06492	-1.38851				XLOC_029508	AT5G58750				-1.26987		XLOC_008575	AT2G01530		1.32832	1.40355
XLOC_029014	AT5G50200	-1.85211	-1.16151				XLOC_001199	AT1G22065	-2.96854	-1.40421				XLOC_020122	AT3G48740				-1.21752		XLOC_016450	AT3G44300		1.23133	1.14542
XLOC_032763	AT5G50120	-1.87778	-2.54966				XLOC_033701	-	2.89402		-1.84394			XLOC_027077	AT5G16590				-1.1727		XLOC_013730	AT2G40890		-1.4193	-1.04662
XLOC_011108	AT2G43670	-1.92884	-2.65186				XLOC_006681	AT1G48070	2.45504		-1.70778			XLOC_019199	AT3G28340				-1.16037		XLOC_006587	AT1G44800		-1.46021	-1.39379
XLOC_019009	AT3G25717	-1.93943	-1.54072				XLOC_001829	AT1G32870	2.03472		-1.617			XLOC_022648	AT4G22666				-1.1519		XLOC_002571	AT1G49470		-1.46696	-1.60071
XLOC_015792	AT3G28050	-2.17952	-2.07962				XLOC_001265	AT1G23160	2.03306		-2.07132			XLOC_024551	AT4G12520				-1.06676		XLOC_018517	AT3G16920		-1.46705	-1.31761
XLOC_020907	AT3G62040	-2.40654	-4.05735				XLOC_030482	AT5G10130	1.83645		-1.10064			XLOC_000205	AT1G04610				-1.0618		XLOC_010185	AT2G27550		-1.52408	-1.13172
XLOC_027396	AT5G23010,AT5G23020	-2.43674	1.76152				XLOC_032983	AT5G54100	1.62421		-1.28808			XLOC_013982	AT2G45400				-1.03384		XLOC_006873	AT1G51680		-1.55386	-1.19935
XLOC_027445	AT5G23840	-2.60531	-1.31176				XLOC_001878	AT1G33750	1.22348		-1.00131			XLOC_000659	AT1G12740				-1.02836		XLOC_014340	AT3G03780		-1.78163	-2.21844
XLOC_000874	AT1G16500	-2.65815	-2.3217				XLOC_019028	AT3G25930	-1.00353		1.82371			XLOC_021718	AT4G08390				-1.02792		XLOC_002528	AT1G48750		-2.19917	-1.4294
XLOC_008825	AT2G05440	-2.67527	-1.22042				XLOC_020312	AT3G51920	-1.00841		1.22118			XLOC_027409	AT5G23210				-1.01929		XLOC_021134	AT4G01440		-2.36985	-1.95117
XLOC_020629	AT3G57520	-3.2121	-2.03302				XLOC_027463	AT5G24165	-1.08227		1.6775			XLOC_013990	AT2G45470				-1.00903		XLOC_015084	AT3G16760,AT3G16770		2.17445		1.83509
XLOC_033092	AT5G56080	-3.5493	-2.8274				XLOC_031259	AT5G24735	-1.09958		1.0481			XLOC_007674	AT1G66270,AT1G66320				-1.0032		XLOC_029098	AT5G51780		1.94219		2.00448
XLOC_030225	AT5G04950	-3.56896	-3.61546				XLOC_030127	AT5G03240	-1.15434		1.0951			XLOC_015824	AT3G28510		3.40843	4.05231			XLOC_017609	AT3G01420		1.58924		1.72481
XLOC_001570	AT1G28850,AT1G28860,AT1G28870,AT1G28880,AT1G28890,AT1G28900	-7.87578	-5.38174				XLOC_000785	AT1G14890	-1.19327		1.42032			XLOC_012871	AT2G26400		3.01693	4.10686			XLOC_004886	AT1G10470		1.36503		1.40741
XLOC_021871	AT4G10310	3.02313		-1.91581			XLOC_027158	AT5G18130	-1.19846		1.22944			XLOC_016581	AT3G46190		2.36229	2.53406			XLOC_030079	AT5G02380		1.35778		1.32236
XLOC_017679	AT3G02850	1.4486		-2.33588			XLOC_025478	AT4G27450	-1.26031		1.01916			XLOC_006795	AT1G50090		2.32698	4.17077			XLOC_020404	AT3G53420		-1.64558		-1.20971
XLOC_017609	AT3G01420	-1.29161		1.36553			XLOC_005635	AT1G23720	-1.26689		3.05633			XLOC_018030	AT3G08860		2.26751	2.44285			XLOC_024319	AT4G08770		-1.7641		-1.53338
XLOC_029446	AT5G57625	-2.06285		3.02349			XLOC_005365	AT1G18980	-1.31674		2.31528			XLOC_013912	AT2G43920		2.05971	3.18763			XLOC_009636	AT2G18800		-3.22413		-2.44415
XLOC_023777	AT4G02270	-3.33172		2.72187			XLOC_025527	AT4G28270	-1.32876		1.57405			XLOC_026260	AT5G01210		2.00992	2.22295			XLOC_009467	AT2G15970			5.32798	-3.0749
XLOC_030323	AT5G06630,AT5G06640	-7.06973		4.93543			XLOC_000558	AT1G11175	-1.45274		1.56565			XLOC_012658	AT2G23030		1.87413	1.91435			XLOC_005822	AT1G27720,AT1G27730			4.63965	-3.55049
XLOC_016363	-	4.39458					XLOC_028422	AT5G40690	-1.51032		1.57743			XLOC_003637	AT1G68050		1.76732	1.89249			XLOC_008074	AT1G73540			2.60441	-2.29751
XLOC_021685	AT4G08093	4.27368					XLOC_028244	AT5G37540	-1.51052		1.53401			XLOC_000828	AT1G15610,AT1G15630		1.73181	1.60051			XLOC_025467	AT4G27280			2.53961	-1.49958
XLOC_013892	AT2G43620	4.16203					XLOC_006759	AT1G49500	-1.52255		1.65635			XLOC_025792	AT4G33070		1.6806	1.37463			XLOC_019199	AT3G28340			2.27333	-1.69309
XLOC_025379	AT4G25700	2.1254					XLOC_010963	AT2G41100	-1.53048		1.79469			XLOC_031171	AT5G23220		1.47575	1.93948			XLOC_031171	AT5G23220			1.96235	-2.46106
XLOC_032645	AT5G48100	1.942					XLOC_004257	AT1G79180	-1.5405		1.20419			XLOC_018238	AT3G12230,AT3G12240		1.44047	2.32488			XLOC_001031	AT1G19180			1.89426	-1.57712
XLOC_000507	AT1G10300	1.91309					XLOC_009841	AT2G22122	-1.59472		1.89768			XLOC_029843	AT5G64790,AT5G64810		1.32768	1.48334			XLOC_008284	AT1G77330			1.33953	-1.62006
XLOC_007381	AT1G61490,AT1G61500	1.86283					XLOC_020311	AT3G51915	-1.80369		1.48468			XLOC_025396	AT4G26080		1.31686	1.25146			XLOC_028153	AT5G35940			1.24656	-2.0502
XLOC_001811	AT1G32583	1.85523					XLOC_021230	AT4G02830	-1.93596		2.40994			XLOC_002584	AT1G49720		1.25188	1.46698			XLOC_001199	AT1G22065			-1.40421	1.75205
XLOC_016795	AT3G49780	1.75153					XLOC_003581	AT1G67148	-2.11089		2.69114			XLOC_014059	AT2G46670,AT2G46680		1.23069	1.33959			XLOC_026705	AT5G09220			-1.42477	1.19615
XLOC_007377	AT1G61420,AT1G61430	1.73638					XLOC_007642	AT1G65845	-2.11789		2.62916			XLOC_017636	AT3G01970,AT3G01980		1.16441	1.01927			XLOC_006083	AT1G32450			-1.93769	2.5745
XLOC_029195	AT5G53450	1.73234					XLOC_022817	AT4G25810	-2.15431		1.52399			XLOC_031352	AT5G26340		1.10842	1.47529			XLOC_033751	AT5G67600		1.00841
XLOC_016401	AT3G43670	1.56414					XLOC_028822	AT5G46890,AT5G46900	-2.35619		2.84533			XLOC_031070	AT5G20830		1.06064	1.77725			XLOC_027328	AT5G21020		1.09743
XLOC_017316	AT3G58800,AT3G58810	1.43031					XLOC_015394	AT3G21710	-2.39091		2.77216			XLOC_028456	AT5G41280,AT5G41290		1.0282	1.97633			XLOC_007159	AT1G56280		1.14004
XLOC_007884	AT1G69840	1.40108					XLOC_032680	AT5G48657	-2.49548		2.86669			XLOC_003887	AT1G72230		-1.1509	-1.64252			XLOC_022105	AT4G14270		1.14814
XLOC_012989	AT2G28400	1.3767					XLOC_026744	AT5G09978	-2.57299		3.19714			XLOC_022917	AT4G27435		-1.37807	-1.02914			XLOC_025953	AT4G36040		1.18
XLOC_000607	AT1G11870	1.3662					XLOC_024550	AT4G12510	-2.61374		2.09571			XLOC_002528	AT1G48750		-1.55689	-3.20006			XLOC_029590	AT5G60200		1.23389
XLOC_010185	AT2G27550	1.29727					XLOC_032572	AT5G46890,AT5G46900	-2.8927		3.6281			XLOC_029907	AT5G65870		-1.56618	-1.34983			XLOC_003218	AT1G60989		1.24496
XLOC_015220	AT3G18980	1.28728					XLOC_014951	AT3G14680	-2.97524		2.38538			XLOC_013731	AT2G40900		-1.57938	-2.00345			XLOC_031100	AT5G21940		1.28459
XLOC_005722	AT1G25530	1.24637					XLOC_015828	AT3G28550	-3.02572		4.2849			XLOC_025196	AT4G22460		-1.66556	-1.78106			XLOC_030271	AT5G05690		1.33881
XLOC_000913	AT1G17170	1.22268					XLOC_022746	AT4G24420	5.57531					XLOC_023163	AT4G31730		-1.71854	-2.51319			XLOC_010874	AT2G39705		1.34065
XLOC_005721	AT1G25510	1.21753					XLOC_016363	-	5.11194					XLOC_027445	AT5G23840		-1.72268	-1.31176			XLOC_007577	AT1G64720		1.36553
XLOC_022429	AT4G19020	1.21667					XLOC_022306	AT4G16980	5.06248					XLOC_026504	AT5G05270		-1.86073	-2.65591			XLOC_008020	AT1G72490		1.38969
XLOC_012918	AT2G27140	1.14175					XLOC_016495	AT3G44790,AT3G44800	4.81496					XLOC_018274	AT3G12830		-1.8762	-1.91834			XLOC_002962	AT1G56220		1.41629
XLOC_026745	AT5G09980	1.08127					XLOC_010635	AT2G35460	4.60949					XLOC_031969	AT5G37260		-2.04713	-2.38914			XLOC_000915	AT1G17190		1.41746
XLOC_014783	AT3G11930	1.07146					XLOC_023430	AT4G36250	3.82622					XLOC_018632	AT3G18990,AT3G19030		-2.13873	-1.66483			XLOC_014731	AT3G10985		1.44529
XLOC_025642	AT4G30460	1.05573					XLOC_022403	-	3.79521					XLOC_001640	AT1G29930		-2.14703	-2.5028			XLOC_025933	AT4G35750		1.47121
XLOC_032007	AT5G37790	1.05203					XLOC_033239	AT5G58784	3.20059					XLOC_011108	AT2G43670		-2.19629	-2.65186			XLOC_003447	AT1G64660		1.49434
XLOC_015751	AT3G27420	1.03053					XLOC_013602	AT2G38750	3.0197					XLOC_018705	AT3G20450		-2.22055	-2.82193			XLOC_032726	AT5G49360		1.49813
XLOC_020083	AT3G48115	-1.03857					XLOC_026152	AT4G39590	2.91367					XLOC_033486	AT5G63160		-2.36448	-2.38541			XLOC_033116	AT5G56550		1.56299
XLOC_006587	AT1G44800	-1.05359					XLOC_004121	AT1G76620	2.85582					XLOC_001668	AT1G30380		-2.48796	-3.35517			XLOC_001112	AT1G20620,AT1G20630		1.63292
XLOC_002354	AT1G44810	-1.11135					XLOC_021152	AT4G01600	2.83796					XLOC_015132	AT3G17609,AT3G17611		-2.49088	-2.92685			XLOC_025478	AT4G27450		1.64867
XLOC_020172	AT3G49601	-1.12697					XLOC_013747	AT2G41190	2.71661					XLOC_033336	AT5G60490		-2.49207	-1.45334			XLOC_026068	AT4G38060		1.7065
XLOC_004886	AT1G10470	-1.15012					XLOC_003942	AT1G73400	2.28043					XLOC_030864	AT5G17300		-2.51312	-3.67262			XLOC_013889	AT2G43590		1.71743
XLOC_000415	AT1G08650	-1.15382					XLOC_028379	AT5G39890	2.19555					XLOC_032763	AT5G50120		-2.99782	-2.54966			XLOC_013910	AT2G43910		1.90974
XLOC_024550	AT4G12510	-1.1705					XLOC_028243	AT5G37530	2.10851					XLOC_011302	AT2G46830		-3.36382	-4.33622			XLOC_023349	AT4G34970		1.95082
XLOC_000735	AT1G13950	-1.17689					XLOC_003315	AT1G62570	1.91267					XLOC_004355	AT1G01060		-3.68084	-5.84819			XLOC_020082	AT3G48100		1.95861
XLOC_001460	AT1G27130,AT1G27140	-1.19638					XLOC_001529	AT1G28210	1.89739					XLOC_031019	AT5G19890		4.75855		2.04084		XLOC_018437	AT3G15353		1.9645
XLOC_006759	AT1G49500	-1.20401					XLOC_013220	AT2G32180	1.89554					XLOC_008820	AT2G05400		2.76774		1.8236		XLOC_012397	AT2G18360		2.08029
XLOC_001407	AT1G26470	-1.26772					XLOC_012236	AT2G15790	1.65245					XLOC_008833	AT2G05520		2.64543		2.12916		XLOC_020389	AT3G53160,AT3G53170		2.15541
XLOC_025082	AT4G20330	-1.26887					XLOC_019990	AT3G46540	1.64722					XLOC_010806	AT2G38390		2.21834		1.52214		XLOC_023005	AT4G28840		2.36646
XLOC_001314	AT1G24240	-1.32946					XLOC_007674	AT1G66270,AT1G66320	1.6269					XLOC_028379	AT5G39890		2.16544		1.47575		XLOC_019426	AT3G30775		2.49584
XLOC_022288	AT4G16710	-1.33943					XLOC_028404	AT5G40400,AT5G40405	1.62186					XLOC_004306	AT1G80160		1.74018		1.6735		XLOC_014070	AT2G46950		2.50505
XLOC_008575	AT2G01530	-1.35139					XLOC_006899	AT1G52060,AT1G52070	1.56324					XLOC_017609	AT3G01420		1.73309		1.20365		XLOC_012078	AT2G13360		2.58783
XLOC_030872	AT5G17460	-1.43358					XLOC_028760	AT5G45920	1.56301					XLOC_021956	AT4G11655		1.53575		1.1217		XLOC_020692	AT3G58520,AT3G58550		2.94964
XLOC_028840	AT5G47240	-1.44469					XLOC_003927	AT1G72970	1.55176					XLOC_032189	AT5G40590		1.4654		1.4451		XLOC_003576	AT1G67105		2.97136
XLOC_002025	AT1G35720	-1.50518					XLOC_009862	AT2G22410	1.50628					XLOC_033338	AT5G60530		-1.01085		-1.40627		XLOC_027361	AT5G22300		3.19744
XLOC_010118	AT2G26355	-1.51307					XLOC_014466	AT3G05980	1.46841					XLOC_009636	AT2G18800		-1.23145		-1.65082		XLOC_004306	AT1G80160		4.41735
XLOC_015600	AT3G24770	-1.52066					XLOC_029745	AT5G62980	1.42735					XLOC_032192	AT5G40630		-1.23385		-1.00534		XLOC_005740	AT1G26250		4.47373
XLOC_014731	AT3G10985	-1.56191					XLOC_014998	AT3G15357	1.411					XLOC_024550	AT4G12510		-1.31546		-1.34109		XLOC_021196	AT4G02280		4.78565
XLOC_026282	AT5G01610	-1.61222					XLOC_030069	AT5G02050	1.39969					XLOC_024999	AT4G19030		-1.44133		-1.31541		XLOC_028268	AT5G38005		-2.71209
XLOC_003863	AT1G71880	-1.71076					XLOC_024540	AT4G12400	1.39464					XLOC_032572	AT5G46890,AT5G46900		-1.58353		-1.47425		XLOC_022171	AT4G15160		-2.41387
XLOC_027641	AT5G27350	-1.94527					XLOC_010131	AT2G26640	1.37218					XLOC_005822	AT1G27720,AT1G27730		-2.0727		-1.49614		XLOC_015540	AT3G23730		-2.26749
XLOC_008574	AT2G01520	-2.04656					XLOC_025438	AT4G26780	1.36641					XLOC_011289	AT2G46685			2.86963	-2.18797		XLOC_018861	AT3G23090		-1.90873
XLOC_018428	AT3G15250	-2.2758					XLOC_002679	AT1G51380	1.31763					XLOC_027118	AT5G17350			2.54878	-2.20926		XLOC_011206	AT2G45290		-1.85412
XLOC_029730	AT5G62720	-2.6998					XLOC_003121	AT1G58380	1.30363					XLOC_028153	AT5G35940			2.45476	-2.07787		XLOC_031108	AT5G22090		-1.80305
XLOC_003557	AT1G66725	-3.26721					XLOC_003340	AT1G63000	1.30151					XLOC_031134	AT5G22570			2.23843	-1.11456		XLOC_022623	AT4G22212		-1.70517
XLOC_021053	AT4G00030,AT4G00040	-3.8469					XLOC_029778	AT5G63660	1.30136					XLOC_020042	AT3G47340			1.89819	-1.15579		XLOC_015545	AT3G23800		-1.70146
XLOC_029995	AT5G67400	-4.57816					XLOC_021982	AT4G12130	1.29175					XLOC_014527	AT3G06990,AT3G07000			1.55812	-1.12519		XLOC_006065	AT1G32100		-1.62794
XLOC_022818	AT4G25820	-4.61156					XLOC_014677	AT3G10110	1.28206					XLOC_006296	AT1G36060			1.55798	-1.27925		XLOC_025148	AT4G21830,AT4G21840		-1.54735
XLOC_014207	AT3G01345	-5.17083					XLOC_003955	AT1G73620	1.27498					XLOC_013754	AT2G41290			1.52467	-1.56577		XLOC_008610	AT2G02130		-1.50687
XLOC_005647	AT1G23950	-6.36789					XLOC_001259	AT1G23100	1.26777					XLOC_014324	AT3G03500			1.30435	-1.26195		XLOC_024672	AT4G14130		-1.48718
XLOC_001300	AT1G23935,AT1G23940	-8.37104					XLOC_033451	AT5G62440	1.26433					XLOC_023712	AT4G01230,AT4G01240			1.27969	-1.1203		XLOC_005639	AT1G23800		-1.47736
XLOC_010635	AT2G35460				5.2449		XLOC_028724	AT5G45210	1.26263					XLOC_023617	AT4G39950			1.01651	-1.33087		XLOC_022068	AT4G13620		-1.42484
XLOC_019318	AT3G29639				5.13391		XLOC_020629	AT3G57520	1.25601					XLOC_018814	AT3G22235,AT3G22240			-1.01589	1.32573		XLOC_003863	AT1G71880		-1.4167
XLOC_008609	AT2G02120				3.86861		XLOC_033088	AT5G56000	1.2537					XLOC_015394	AT3G21710			-1.0812	1.11867		XLOC_022817	AT4G25810		-1.34899
XLOC_022403	-				3.66485		XLOC_010783	AT2G37990	1.23455					XLOC_020434	AT3G53980			-1.09747	1.20234		XLOC_013932	AT2G44300		-1.20253
XLOC_001074	AT1G20015				3.52403		XLOC_027115	AT5G17270	1.22598					XLOC_019028	AT3G25930			-1.10772	1.00021		XLOC_017468	AT3G61430		-1.18401
XLOC_004823	AT1G09415,AT1G09420				3.52051		XLOC_010326	AT2G30130	1.21125					XLOC_001245	AT1G22885			-1.12708	1.02369		XLOC_025076	AT4G20210		-1.13742
XLOC_023638	AT4G00165				3.44268		XLOC_014286	AT3G02650	1.19526					XLOC_015876	AT3G29240			-1.13383	1.48037		XLOC_023288	AT4G34050		-1.13428
XLOC_028028	-				3.44168		XLOC_029490	AT5G58370	1.19317					XLOC_018350	AT3G13910			-1.23413	1.25788		XLOC_025149	AT4G21850		-1.07643
XLOC_004878	AT1G10370				3.29555		XLOC_018087	AT3G09800	1.17944					XLOC_000365	AT1G07700			-1.55059	1.38015		XLOC_027444	AT5G23830		-1.06661
XLOC_020593	AT3G56891				3.27635		XLOC_020340	AT3G52390	1.17368					XLOC_010805	AT2G38380			-1.5717	2.01853		XLOC_019564	AT3G32980		-1.06037
XLOC_019026	AT3G25905				3.23139		XLOC_010569	AT2G34260	1.17045					XLOC_018881	AT3G23430			-1.59277	1.20951		XLOC_003300	AT1G62380		-1.05605
XLOC_002592	AT1G49860,AT1G49870				3.21776		XLOC_000206	AT1G04635	1.16586					XLOC_007669	AT1G66200			-1.75496	1.47413		XLOC_013495	AT2G36880		-1.03978
XLOC_028522	AT5G42235				3.17979		XLOC_020113	AT3G48570	1.1493					XLOC_029974	AT5G66985			-1.89057	1.23675		XLOC_008176	AT1G75500		-1.02239
XLOC_030973	AT5G19100				3.14842		XLOC_030537	AT5G11030	1.14					XLOC_007580	AT1G64780			-3.15049	1.92674		XLOC_010212	AT2G28190		-1.00886
XLOC_008869	AT2G05995				3.08345		XLOC_020040	AT3G47300	1.12418					XLOC_001053	AT1G19530			2.17999	1.28472		XLOC_024484	AT4G11600,AT4G11610			1.00287
XLOC_001410	AT1G26530				3.03985		XLOC_033337	AT5G60520	1.10587					XLOC_004456	AT1G02920			1.95283	1.05989		XLOC_028375	AT5G39850			1.00772
XLOC_010332	AT2G30230				2.98873		XLOC_009895	AT2G22840	1.10556					XLOC_014702	AT3G10450			1.8312	1.01649		XLOC_031995	AT5G37600			1.0087
XLOC_001509	AT1G27950				2.97623		XLOC_014822	AT3G12860	1.10502					XLOC_022688	AT4G23570		1.11982				XLOC_023104	AT4G30660			1.01449
XLOC_015726	AT3G27027				2.84237		XLOC_005294	AT1G17690	1.09923					XLOC_018254	AT3G12500		1.21557				XLOC_019974	AT3G46280			1.02998
XLOC_025022	AT4G19370				2.8047		XLOC_033539	AT5G64080	1.09571					XLOC_006861	AT1G51420		1.21684				XLOC_012523	AT2G20625,AT2G20630			1.03771
XLOC_001398	AT1G26250				2.62427		XLOC_018347	AT3G13860	1.09443					XLOC_030872	AT5G17460		1.23209				XLOC_033509	AT5G63595,AT5G63600			1.04036
XLOC_012039	-				2.61502		XLOC_022869	AT4G26600	1.08761					XLOC_016450	AT3G44300		1.24518				XLOC_025230	AT4G23010			1.05224
XLOC_013698	AT2G40300				2.45716		XLOC_010196	AT2G27840	1.07684					XLOC_020389	AT3G53160,AT3G53170		1.26604				XLOC_029449	AT5G57660			1.05948
XLOC_004348	AT1G80960				2.36646		XLOC_026325	AT5G02280	1.07428					XLOC_002878	AT1G54890		1.31267				XLOC_007000	AT1G53580			1.06598
XLOC_031214	AT5G24060				2.33409		XLOC_007332	AT1G60770	1.07209					XLOC_019081	AT3G26744		1.45813				XLOC_018522	AT3G17020			1.07512
XLOC_009453	AT2G15830				2.25363		XLOC_023261	AT4G33550	1.06543					XLOC_024820	AT4G16260		1.49336				XLOC_006861	AT1G51420			1.07978
XLOC_018108	AT3G10130				2.23135		XLOC_017277	AT3G57940	1.0648					XLOC_025476	AT4G27410		1.73539				XLOC_033338	AT5G60530			1.08089
XLOC_033083	AT5G55896,AT5G55896.1				2.20919		XLOC_015739	AT3G27280	1.06228					XLOC_014882	AT3G13650		1.96404				XLOC_024880	AT4G17100			1.10656
XLOC_014257	AT3G02240				2.16355		XLOC_018606	AT3G18580	1.06129					XLOC_008273	AT1G77145		2.2496				XLOC_023082	AT4G30170			1.11787
XLOC_028597	AT5G43210				2.12375		XLOC_004760	AT1G08220	1.05076					XLOC_019215	AT3G28510		2.47566				XLOC_012322	AT2G17080			1.1208
XLOC_021775	AT4G09100				2.08979		XLOC_012264	AT2G16230	1.0485					XLOC_013130	AT2G30670		2.91228				XLOC_021730	AT4G08555			1.12789
XLOC_020422	AT3G53730				2.0729		XLOC_002512	AT1G48500,AT1G48510	1.04591					XLOC_017593	AT3G01311		3.48275				XLOC_027169	AT5G18310			1.13287
XLOC_012239	AT2G15830				2.06828		XLOC_014572	AT3G07770	1.04569					XLOC_007625	AT1G65570		-6.46144				XLOC_015306	AT3G20370			1.1334
XLOC_021938	AT4G11360				2.04192		XLOC_031070	AT5G20830	1.04329					XLOC_007972	AT1G71380		-4.25107				XLOC_002831	AT1G54030			1.13425
XLOC_033703	AT5G66840				2.03912		XLOC_007675	AT1G66280	1.04014					XLOC_030252	AT5G05340		-3.81021				XLOC_024999	AT4G19030			1.13477
XLOC_033819	-				2.03341		XLOC_018771	AT3G21540	1.03816					XLOC_005373	AT1G19210,AT1G19220		-3.59599				XLOC_028282	AT5G38200			1.14783
XLOC_033508	AT5G63590				2.02831		XLOC_013153	AT2G31060	1.03482					XLOC_003557	AT1G66725		-2.96918				XLOC_017613	AT3G01472			1.1626
XLOC_010641	AT2G35585				2.02733		XLOC_000011	AT1G01210	1.03014					XLOC_030539	AT5G11070		-2.73747				XLOC_004504	AT1G03850			1.16427
XLOC_007625	AT1G65570				1.99323		XLOC_025271	AT4G23620	1.02677					XLOC_004197	AT1G78020		-2.13415				XLOC_028644	AT5G44020			1.16447
XLOC_019025	AT3G25882				1.99284		XLOC_033417	AT5G61790	1.02381					XLOC_017643	AT3G02140		-1.97399				XLOC_002878	AT1G54890			1.17931
XLOC_013220	AT2G32180				1.98144		XLOC_005963	AT1G30550	1.01767					XLOC_013700	AT2G40330		-1.829				XLOC_004573	AT1G05010			1.19355
XLOC_006905	AT1G52130				1.98127		XLOC_020550	AT3G56070	1.01248					XLOC_033188	AT5G57785		-1.81781				XLOC_005145	AT1G14870			1.20481
XLOC_010650	AT2G35690				1.91004		XLOC_024966	AT4G18440	1.01113					XLOC_004459	AT1G02950		-1.80059				XLOC_013891	AT2G43610			1.2068
XLOC_010426	AT2G31940				1.88752		XLOC_033085	AT5G55920	1.00714					XLOC_021932	AT4G11280		-1.73022				XLOC_014549	AT3G07390			1.22712
XLOC_029745	AT5G62980				1.87613		XLOC_024571	AT4G12880	1.00608					XLOC_028128	AT5G35732		-1.45701				XLOC_030425	AT5G08730,AT5G08790			1.24283
XLOC_017318	AT3G58865.1				1.87389		XLOC_004527	AT1G04290,AT1G04300	1.00301					XLOC_001831	AT1G32920		-1.39753				XLOC_028426	AT5G40730			1.24371
XLOC_029778	AT5G63660				1.8715		XLOC_025951	AT4G36020	1.00151					XLOC_018105	AT3G10080		-1.37659				XLOC_007409	AT1G61890			1.27067
XLOC_028108	AT5G35525				1.86747		XLOC_012993	AT2G28450	-1.00703					XLOC_033284	AT5G59550		-1.37105				XLOC_008071	AT1G73500			1.28677
XLOC_005599	AT1G23140				1.86225		XLOC_009930	AT2G23320	-1.01391					XLOC_017237	AT3G57230		-1.30197				XLOC_012525	AT2G20670			1.28829
XLOC_000877	AT1G16590				1.85521		XLOC_018902	AT3G23880	-1.01533					XLOC_022623	AT4G22212		-1.18199				XLOC_015626	AT3G25250			1.32172
XLOC_007385	AT1G61560				1.82958		XLOC_002962	AT1G56220	-1.02119					XLOC_003576	AT1G67105		-1.16796				XLOC_006604	AT1G45145			1.32231
XLOC_007864	AT1G69550				1.82559		XLOC_005198	AT1G15800	-1.03065					XLOC_027553	AT5G25890		-1.15341				XLOC_012300	AT2G16720			1.33441
XLOC_000830	-				1.82055		XLOC_016997	AT3G53190,AT3G53210	-1.03251					XLOC_025406	AT4G26320		-1.1248				XLOC_028429	AT5G40780			1.33955
XLOC_014258	AT3G02242				1.80339		XLOC_033639	AT5G65660	-1.03292					XLOC_005722	AT1G25530		-1.10158				XLOC_023713	AT4G01250			1.33984
XLOC_021154	AT4G01630				1.79295		XLOC_029971	AT5G66930	-1.03828					XLOC_027037	AT5G15830		-1.08535				XLOC_028492	AT5G41800,AT5G41810			1.34697
XLOC_017935	AT3G06680				1.77479		XLOC_009388	AT2G14878	-1.05267					XLOC_005862	AT1G28400		-1.07307				XLOC_017216	AT3G56880			1.3585
XLOC_027320	AT5G20810				1.75045		XLOC_010520	AT2G33510	-1.05271					XLOC_000621	AT1G12080		-1.06512				XLOC_022742	AT4G24310			1.36976
XLOC_007952	AT1G70990				1.68191		XLOC_029618	AT5G60680	-1.05603					XLOC_014986	AT3G15210		-1.04604				XLOC_030399	AT5G08240			1.39779
XLOC_012695	AT2G23600,AT2G23610				1.66523		XLOC_011409	AT2G01420	-1.05854					XLOC_030356	AT5G07322		-1.03822				XLOC_004166	AT1G77510			1.41078
XLOC_004197	AT1G78020				1.66183		XLOC_027328	AT5G21020	-1.05959					XLOC_013095	AT2G30210			1.00058			XLOC_024902	AT4G17486,AT4G17490			1.43964
XLOC_018597	AT3G18450				1.66098		XLOC_025953	AT4G36040	-1.06009					XLOC_028964	AT5G49440			1.00701			XLOC_026593	AT5G06860			1.44139
XLOC_029694	AT5G62150				1.6593		XLOC_015179	AT3G18280	-1.07055					XLOC_008071	AT1G73500			1.00985			XLOC_009490	AT2G16365			1.44897
XLOC_001264	AT1G23150				1.65207		XLOC_000784	AT1G14860	-1.07745					XLOC_001281	AT1G23480			1.01015			XLOC_011416	AT2G01540			1.45152
XLOC_007198	AT1G57790				1.63466		XLOC_009555	AT2G17440	-1.08116					XLOC_007885	AT1G69850			1.01355			XLOC_032439	AT5G44610			1.453
XLOC_025010	AT4G19160				1.6302		XLOC_007491	AT1G63090	-1.08193					XLOC_025696	AT4G31500			1.0224			XLOC_029843	AT5G64790,AT5G64810			1.46108
XLOC_013186	AT2G31585				1.61681		XLOC_017927	AT3G06590	-1.082					XLOC_014417	AT3G05155			1.02354			XLOC_028456	AT5G41280,AT5G41290			1.47223
XLOC_009510	AT2G16750				1.61627		XLOC_020448	AT3G54260	-1.08475					XLOC_030108	AT5G02810			1.02943			XLOC_018058	AT3G09260			1.48539
XLOC_030708	AT5G14330				1.60789		XLOC_016607	AT3G46590	-1.08852					XLOC_024664	AT4G14030,AT4G14040			1.03004			XLOC_026561	AT5G06270			1.49767
XLOC_015053	AT3G16220				1.59487		XLOC_001058	AT1G19680	-1.08916					XLOC_028282	AT5G38200			1.03584			XLOC_017590	AT3G01290			1.49828
XLOC_013019	AT2G28870				1.58488		XLOC_016940	AT3G52290	-1.09676					XLOC_032320	AT5G42920			1.04026			XLOC_015195	AT3G18560			1.5126
XLOC_021050	-				1.54825		XLOC_004356	AT1G01070	-1.10679					XLOC_012252	AT2G16060			1.04148			XLOC_000959	AT1G17860			1.51321
XLOC_021939	AT4G11370				1.53637		XLOC_032665	AT5G48412	-1.10887					XLOC_016601	AT3G46490,AT3G46500			1.05694			XLOC_006912	AT1G52200			1.51499
XLOC_010096	AT2G25950				1.52925		XLOC_020157	AT3G49360,AT3G49370	-1.12276					XLOC_025630	AT4G30280			1.06751			XLOC_005789	AT1G27100			1.52373
XLOC_029847	AT5G64850				1.52532		XLOC_007389	AT1G61580,AT1G61590	-1.12321					XLOC_025264	AT4G23510			1.08023			XLOC_003923	AT1G72890,AT1G72900			1.52416
XLOC_012515	AT2G20562				1.51622		XLOC_027424	AT5G23460	-1.13378					XLOC_006922	AT1G52342			1.08911			XLOC_030897	AT5G17820			1.52809
XLOC_001726	AT1G31170				1.47711		XLOC_007739	AT1G67300	-1.13382					XLOC_009438	AT2G15480,AT2G15490			1.1082			XLOC_028524	AT5G42250			1.53493
XLOC_004203	AT1G78090				1.45483		XLOC_026282	AT5G01610	-1.13944					XLOC_033438	AT5G62190			1.10854			XLOC_001831	AT1G32920			1.54968
XLOC_029603	AT5G60430,AT5G60440				1.45338		XLOC_001422	AT1G26665	-1.1508					XLOC_004919	AT1G10990			1.10872			XLOC_030108	AT5G02810			1.55425
XLOC_020439	AT3G54085				1.44069		XLOC_012244	AT2G15880,AT2G15890	-1.15631					XLOC_005774	AT1G26820			1.113			XLOC_014257	AT3G02240			1.57746
XLOC_026528	AT5G05710				1.43962		XLOC_017116	AT3G55370	-1.1674					XLOC_019997	AT3G46620			1.13018			XLOC_011570	AT2G04170			1.58527
XLOC_028894	AT5G48290				1.4285		XLOC_031362	AT5G26622	-1.17303					XLOC_021164	AT4G01770			1.13624			XLOC_015500	AT3G23190			1.58766
XLOC_022318	AT4G17215				1.41379		XLOC_011159	AT2G44500	-1.17379					XLOC_022817	AT4G25810			1.1457			XLOC_012989	AT2G28400			1.59932
XLOC_024965	AT4G18430				1.40997		XLOC_020021	AT3G47000,AT3G47010	-1.17476					XLOC_014549	AT3G07390			1.14641			XLOC_033409	AT5G61590,AT5G61600,AT5G61605			1.6027
XLOC_031523	AT5G28750				1.40774		XLOC_011023	AT2G42190	-1.18716					XLOC_007031	AT1G54100			1.15226			XLOC_024591	AT4G13195			1.62404
XLOC_025033	AT4G19520				1.40474		XLOC_033419	AT5G61820	-1.19122					XLOC_000131	AT1G03230			1.15635			XLOC_011340	AT2G47485			1.63002
XLOC_031413	AT5G27660				1.40342		XLOC_007885	AT1G69850	-1.19684					XLOC_029423	AT5G57090			1.16425			XLOC_013740	AT2G41010			1.68753
XLOC_023261	AT4G33550				1.40278		XLOC_005060	AT1G13450	-1.19752					XLOC_028429	AT5G40780			1.16729			XLOC_004619	AT1G05650,AT1G05660			1.72277
XLOC_010831	AT2G38780				1.40214		XLOC_025719	AT4G31860	-1.20896					XLOC_022689	AT4G23590			1.17475			XLOC_027230	AT5G19230			1.7255
XLOC_014607	AT3G08890				1.39081		XLOC_023383	AT4G35600	-1.21125					XLOC_004020	AT1G74790			1.18304			XLOC_003617	AT1G67750			1.72671
XLOC_025406	AT4G26320				1.38593		XLOC_015471	AT3G22850	-1.21924					XLOC_005257	AT1G17060			1.18488			XLOC_012549	AT2G21020			1.74796
XLOC_026479	AT5G04750				1.38545		XLOC_015676	AT3G26100	-1.23303					XLOC_021265	AT4G03420			1.22152			XLOC_020120	AT3G48690			1.87885
XLOC_022198	AT4G15450				1.38273		XLOC_011412	AT2G01450	-1.23837					XLOC_030636	AT5G13080			1.23287			XLOC_003683	AT1G68840			1.88245
XLOC_010410	AT2G31585				1.36998		XLOC_020029	AT3G47160	-1.23869					XLOC_027374	AT5G22555			1.24424			XLOC_001286	AT1G23710			1.89388
XLOC_006912	AT1G52200				1.35966		XLOC_028804	AT5G46700	-1.27589					XLOC_003764	AT1G70090			1.24501			XLOC_005917	AT1G29640			1.89407
XLOC_026325	AT5G02280				1.35678		XLOC_027162	AT5G18200	-1.27877					XLOC_013625	AT2G39210			1.25484			XLOC_010840	AT2G38940			1.89451
XLOC_026343	AT5G02560				1.3555		XLOC_010244	AT2G28660	-1.2996					XLOC_005077	AT1G13750			1.26099			XLOC_002578	AT1G49570			1.89977
XLOC_030680	AT5G13870				1.35509		XLOC_027421	AT5G23380	-1.30074					XLOC_004929	AT1G11190			1.28231			XLOC_013646	AT2G39518			1.903
XLOC_026071	AT4G38100				1.3549		XLOC_015006	AT3G15450	-1.32256					XLOC_033677	AT5G66390,AT5G66420			1.28399			XLOC_000831	AT1G15640			1.94706
XLOC_027359	AT5G22210				1.35017		XLOC_015523	AT3G23470,AT3G23480,AT3G23510,AT3G23530	-1.32608					XLOC_014691	AT3G10300			1.2866			XLOC_018769	AT3G21510			1.95139
XLOC_013195	AT2G31730				1.34634		XLOC_007911	AT1G70290	-1.33385					XLOC_013578	AT2G38290			1.29652			XLOC_010812	AT2G38470			2.01776
XLOC_029184	AT5G53250				1.32811		XLOC_007346	AT1G60940	-1.34153					XLOC_021882	AT4G10500			1.29765			XLOC_025720	AT4G31875			2.02653
XLOC_004527	AT1G04290,AT1G04300				1.32787		XLOC_026406	AT5G03510	-1.35294					XLOC_021056	AT4G00080			1.30136			XLOC_021154	AT4G01630			2.036
XLOC_001529	AT1G28210				1.3247		XLOC_001976	AT1G35190	-1.40377					XLOC_030342	AT5G07010			1.30515			XLOC_004422	AT1G02360			2.06971
XLOC_019832	AT3G44380				1.30428		XLOC_026359	AT5G02840	-1.40744					XLOC_010327	AT2G30140			1.33049			XLOC_023486	AT4G37410			2.11533
XLOC_031390	AT5G27210				1.2996		XLOC_015270	AT3G19860	-1.42181					XLOC_023122	AT4G31000			1.33947			XLOC_030872	AT5G17460			2.1231
XLOC_000697	AT1G13270				1.2817		XLOC_004188	AT1G77885	-1.43198					XLOC_023951	AT4G04700			1.3427			XLOC_030636	AT5G13080			2.15439
XLOC_012845	AT2G25964,AT2G25970				1.27516		XLOC_020389	AT3G53160,AT3G53170	-1.43576					XLOC_011570	AT2G04170			1.34641			XLOC_020290	AT3G51600			2.18956
XLOC_026344	AT5G02580				1.27402		XLOC_031447	AT5G28080	-1.48073					XLOC_026972	AT5G14730			1.40274			XLOC_008240	AT1G76600			2.19473
XLOC_024596	AT4G13235				1.27294		XLOC_022452	AT4G19490	-1.49261					XLOC_018389	AT3G14440			1.40868			XLOC_030342	AT5G07010			2.19815
XLOC_009836	AT2G22080				1.26179		XLOC_028592	AT5G43150	-1.514					XLOC_030274	AT5G05730			1.41629			XLOC_016818	AT3G50260			2.22052
XLOC_000048	AT1G01750				1.25438		XLOC_015584	AT3G24520	-1.51464					XLOC_002366	AT1G44970			1.42915			XLOC_007686	AT1G66500			2.25288
XLOC_022075	AT4G13830				1.25397		XLOC_009155	AT2G11270	-1.54512					XLOC_006573	AT1G44180			1.43989			XLOC_003725	AT1G69530			2.26519
XLOC_025222	AT4G22830,AT4G22840				1.23935		XLOC_001245	AT1G22885	-1.56147					XLOC_001172	AT1G21680			1.44137			XLOC_003239	AT1G61340			2.31332
XLOC_024792	AT4G15802				1.23713		XLOC_020194	AT3G50010	-1.56166					XLOC_032420	AT5G44380			1.44185			XLOC_013678	AT2G40000			2.34992
XLOC_007659	AT1G66080				1.22706		XLOC_026298	AT5G01850	-1.65857					XLOC_006681	AT1G48070			1.45319			XLOC_015374	AT3G21351			2.35653
XLOC_010040	AT2G25060				1.22605		XLOC_005259	AT1G17090	-1.66246					XLOC_002896	AT1G55120			1.48834			XLOC_004119	AT1G76600			2.36013
XLOC_032748	AT5G49800				1.22486		XLOC_022781	AT4G25070,AT4G25080	-1.6673					XLOC_007675	AT1G66280			1.54559			XLOC_011333	AT2G47400			2.40467
XLOC_030482	AT5G10130				1.22479		XLOC_020991	AT3G63320,AT3G63340	-1.70564					XLOC_017348	AT3G59480			1.56518			XLOC_012658	AT2G23030			2.42582
XLOC_008189	AT1G75730				1.22039		XLOC_020083	AT3G48115	-1.74473					XLOC_016864	AT3G50930			1.56869			XLOC_032146	AT5G40000			2.45619
XLOC_028585	AT5G43080				1.21616		XLOC_005859	AT1G28330	-1.76686					XLOC_032527	AT5G46050			1.57239			XLOC_029266	AT5G54490			2.55076
XLOC_008124	AT1G74440				1.21385		XLOC_002653	AT1G50970	-1.7783					XLOC_031447	AT5G28080			1.58575			XLOC_003924	AT1G72910,AT1G72920,AT1G72930,AT1G72940			2.66935
XLOC_022067	AT4G13615				1.21156		XLOC_008574	AT2G01520	-1.80033					XLOC_002917	AT1G55430			1.59269			XLOC_021932	AT4G11280			2.67321
XLOC_025528	AT4G28290				1.20406		XLOC_032913	AT5G52870	-1.81964					XLOC_028329	AT5G38940			1.59947			XLOC_030307	AT5G06320			2.72195
XLOC_022271	AT4G16447				1.19531		XLOC_005444	AT1G20480,AT1G20490	-1.99304					XLOC_028718	AT5G45110			1.60234			XLOC_004614	AT1G05575,AT1G05577			2.75284
XLOC_023602	AT4G39730				1.19333		XLOC_029907	AT5G65870	-2.0238					XLOC_003924	AT1G72910,AT1G72920,AT1G72930,AT1G72940			1.61853			XLOC_010069	AT2G25510			2.90518
XLOC_030308	AT5G06330				1.19215		XLOC_021638	AT4G07825	-2.03615					XLOC_022441	AT4G19230			1.63311			XLOC_020584	AT3G56710			2.99352
XLOC_027005	AT5G15290				1.18881		XLOC_022784	AT4G25170	-2.11844					XLOC_026709	AT5G09290			1.6426			XLOC_031352	AT5G26340			3.07092
XLOC_021870	AT4G10300				1.16575		XLOC_018428	AT3G15250	-2.16048					XLOC_025042	AT4G19720			1.66697			XLOC_024820	AT4G16260			3.08017
XLOC_006543	AT1G43790				1.16548		XLOC_012397	AT2G18360	-2.16392					XLOC_032052	AT5G38550			1.67061			XLOC_027374	AT5G22555			3.08846
XLOC_032309	AT5G42785				1.16533		XLOC_021327	AT4G04040	-2.16828					XLOC_007890	AT1G69930			1.69462			XLOC_031134	AT5G22570			3.14681
XLOC_029503	AT5G58575				1.16379		XLOC_025345	AT4G25100	-2.17485					XLOC_003923	AT1G72890,AT1G72900			1.7103			XLOC_019820	AT3G44260			3.19047
XLOC_025192	AT4G22380				1.16205		XLOC_009341	AT2G14255	-2.178					XLOC_027396	AT5G23010,AT5G23020			1.76152			XLOC_029570	AT5G59820			3.28294
XLOC_004454	AT1G02900				1.15906		XLOC_011410	AT2G01430	-2.18944					XLOC_024591	AT4G13195			1.77453			XLOC_003337	AT1G62980			3.33574
XLOC_033539	AT5G64080				1.15817		XLOC_025362	AT4G25434	-2.2169					XLOC_012817	AT2G25450			1.78235			XLOC_018156	AT3G10930			3.58964
XLOC_012334	AT2G17300				1.15557		XLOC_031016	AT5G19870	-2.36551					XLOC_025853	AT4G33980			1.81372			XLOC_008833	AT2G05520			3.87627
XLOC_014568	AT3G07720				1.15071		XLOC_007576	AT1G64700	-2.43145					XLOC_015103	AT3G17110			1.84567			XLOC_032707	AT5G49080.1			3.99887
XLOC_033141	AT5G57000				1.14138		XLOC_029555	AT5G59570	-2.4706					XLOC_007450	AT1G62440			1.92228			XLOC_004026	AT1G74930			4.30667
XLOC_020113	AT3G48570				1.14025		XLOC_017829	AT3G05140	-2.47816					XLOC_008061	AT1G73260			1.92757			XLOC_033150	AT5G57190			-3.0045
XLOC_015431	AT3G22121,AT3G22142				1.13843		XLOC_011108	AT2G43670	-2.6134					XLOC_027141	AT5G17847,AT5G17850			1.92875			XLOC_004355	AT1G01060			-2.59555
XLOC_017167	AT3G56010				1.13399		XLOC_007282	AT1G60000	-2.64276					XLOC_024377	AT4G09780			1.99858			XLOC_017743	AT3G03770			-2.41057
XLOC_020386	AT3G53100				1.13344		XLOC_008548	AT2G01008	-2.74611					XLOC_030891	AT5G17760			2.12327			XLOC_031969	AT5G37260			-2.28386
XLOC_029242	AT5G54145				1.12569		XLOC_011508	AT2G03200	-2.90818					XLOC_020108	AT3G48520			2.12687			XLOC_021849	AT4G09950			-2.25526
XLOC_030820	AT5G16480				1.12467		XLOC_022318	AT4G17215	-3.02922					XLOC_020011	AT3G46810			2.12804			XLOC_030864	AT5G17300			-2.08464
XLOC_018154	AT3G10912				1.12438		XLOC_010118	AT2G26355	-3.03329					XLOC_020444	AT3G54150			2.12926			XLOC_003120	AT1G58370			-2.04003
XLOC_006965	AT1G53030				1.12183		XLOC_011289	AT2G46685	-3.05152					XLOC_005570	AT1G22570			2.14544			XLOC_033486	AT5G63160			-2.02855
XLOC_018388	AT3G14430				1.12089		XLOC_027139	AT5G17800	-3.09276					XLOC_032318	AT5G42900			2.14559			XLOC_027396	AT5G23010,AT5G23020			-1.98752
XLOC_020180	AT3G49744,AT3G49750				1.12028		XLOC_008127	AT1G74460	-3.15536					XLOC_015008	AT3G15500			2.16483			XLOC_011286	AT2G46630			-1.91921
XLOC_012510	AT2G20480				1.11644		XLOC_026284	AT5G01670	-3.16203					XLOC_007454	AT1G62510			2.20284			XLOC_024983	AT4G18780			-1.76755
XLOC_011113	AT2G43720				1.11315		XLOC_007227	AT1G58270	-3.25655					XLOC_024761	AT4G15300			2.40952			XLOC_032148	AT5G40020			-1.60482
XLOC_021152	AT4G01600				1.11186		XLOC_032472	AT5G45220	-3.28764					XLOC_014947	AT3G14620			2.5582			XLOC_018007	AT3G08040			-1.59316
XLOC_010865	AT2G39500				1.11159		XLOC_016967	AT3G52680,AT3G52690	-3.29425					XLOC_032146	AT5G40000			2.67733			XLOC_014694	AT3G10340			-1.55695
XLOC_009830	AT2G22000				1.10161		XLOC_022453	AT4G19500	-3.34164					XLOC_015497	AT3G23150			2.7466			XLOC_033336	AT5G60490			-1.47187
XLOC_003278	AT1G62040				1.0954		XLOC_020935	AT3G62460	-3.55452					XLOC_028341	AT5G39050			2.76268			XLOC_001128	AT1G20850			-1.4551
XLOC_013425	AT2G35733,AT2G35736				1.09462		XLOC_002013	AT1G35612.1	-3.60818					XLOC_026844	AT5G11920			2.96782			XLOC_004459	AT1G02950			-1.44999
XLOC_015501	AT3G23200				1.09391		XLOC_002334	AT1G44050	-3.77074					XLOC_018933	AT3G24310			3.02905			XLOC_010788	AT2G38080			-1.44193
XLOC_022353	AT4G17870				1.09274		XLOC_032466	AT5G45113	-3.85612					XLOC_020545	AT3G55970			3.57601			XLOC_007980	AT1G71692			-1.37189
XLOC_013809	AT2G42110				1.0914		XLOC_021053	AT4G00030,AT4G00040	-4.35754					XLOC_001570	AT1G28850,AT1G28860,AT1G28870,AT1G28880,AT1G28890,AT1G28900			-5.38174			XLOC_005377	AT1G19300			-1.34811
XLOC_024137	AT4G06701				1.08825		XLOC_022501	AT4G20390	-5.35411					XLOC_016880	AT3G51240			-5.07005			XLOC_001012	AT1G18880			-1.33642
XLOC_002903	AT1G55205				1.08819		XLOC_029443	AT5G57565	-6.04562					XLOC_019675	AT3G42658.1			-4.76011			XLOC_001126	AT1G20823			-1.33485
XLOC_000831	AT1G15640				1.08149		XLOC_024629	AT4G13554,AT4G13555	-6.82718					XLOC_007730	AT1G67195			-4.2512			XLOC_032612	AT5G47500			-1.32834
XLOC_011743	AT2G06925				1.08083		XLOC_023523	AT4G38080,AT4G38092	-7.03967					XLOC_017210	AT3G56730			-3.81858			XLOC_018899	AT3G23810			-1.287
XLOC_003955	AT1G73620				1.08013		XLOC_013342	AT2G34315	-7.15294					XLOC_003235	AT1G61280,AT1G61290			-3.68849			XLOC_030821	AT5G16486,AT5G16490			-1.24456
XLOC_032355	AT5G43350				1.07414		XLOC_009986	AT2G24340				6.18261		XLOC_026793	AT5G10970			-3.41199			XLOC_018105	AT3G10080			-1.19773
XLOC_021465	AT4G05590				1.07054		XLOC_031890	AT5G36240				3.93312		XLOC_022012	AT4G12800			-3.03003			XLOC_017237	AT3G57230			-1.15574
XLOC_012111	AT2G13820				1.06998		XLOC_030973	AT5G19100				3.77478		XLOC_004383	AT1G01610			-3.00965			XLOC_025897	AT4G34980			-1.14073
XLOC_016797	AT3G49845				1.06873		XLOC_017569	AT3G63370				3.62684		XLOC_020600	AT3G57020			-2.98602			XLOC_019128	AT3G27200			-1.04888
XLOC_004796	AT1G08880				1.0669		XLOC_021685	AT4G08093				3.39719		XLOC_011656	AT2G05620			-2.92857			XLOC_022917	AT4G27435			-1.03337
XLOC_004015	AT1G74700				1.06615		XLOC_031961	AT5G37072				2.92712		XLOC_033092	AT5G56080			-2.8274
XLOC_015109	AT3G17185				1.06563		XLOC_019026	AT3G25905				2.87258		XLOC_020486	AT3G54890			-2.82694
XLOC_029720	AT5G62570,AT5G62575,AT5G62576				1.06193		XLOC_032395	AT5G44010				2.72083		XLOC_022625	AT4G22217			-2.77948			XLOC_004983	AT1G12090	1.28483	-3.17485	1.40585	-3.28272
XLOC_008295	AT1G77540,AT1G77550				1.05776		XLOC_019165	AT3G27884				2.02143		XLOC_004250	AT1G79040			-2.66105			XLOC_005428	AT1G20190	1.08555	-1.34234	1.17587	-1.42163
XLOC_033545	AT5G64140				1.0568		XLOC_021133	AT4G01430				2.01635		XLOC_000222	AT1G05000			-2.60526			XLOC_018784	AT3G21720	-2.0778	4.6298		1.58445
XLOC_002469	AT1G47820				1.05151		XLOC_028597	AT5G43210				1.99954		XLOC_004635	AT1G06040			-2.40557			XLOC_009896	AT2G22860	-1.0816	1.78796	1.22882
XLOC_023949	AT4G04692				1.0514		XLOC_017318	AT3G58865.1				1.99408		XLOC_027375	AT5G22580			-2.39817			XLOC_019068	AT3G26520	1.71795	-1.50644	1.31597
XLOC_001189	AT1G21930				1.04914		XLOC_001910	AT1G34180				1.99309		XLOC_000874	AT1G16500			-2.3217			XLOC_027000	AT5G15180	1.87837	-1.82863	1.35717
XLOC_030356	AT5G07322				1.04612		XLOC_030971	AT5G19040				1.98651		XLOC_032857	AT5G51795			-2.28128			XLOC_012871	AT2G26400		3.35932	1.39031	1.43338
XLOC_024454	AT4G11080				1.0454		XLOC_018405	AT3G14780				1.89398		XLOC_025078	AT4G20235,AT4G20240			-2.24181			XLOC_022000	AT4G12545,AT4G12550		-4.41706	-1.29227	-2.10559
XLOC_003261	AT1G61795				1.04428		XLOC_032754	AT5G49900				1.85016		XLOC_031281	AT5G25090			-2.21625
XLOC_027228	AT5G19190				1.03978		XLOC_004203	AT1G78090				1.83333		XLOC_020629	AT3G57520			-2.03302
XLOC_032673	AT5G48530,AT5G48540				1.0396		XLOC_007377	AT1G61420,AT1G61430				1.79006		XLOC_006083	AT1G32450			-2.01891
XLOC_007259	AT1G59640				1.03805		XLOC_008610	AT2G02130				1.74897		XLOC_026121	AT4G39070			-1.99561
XLOC_007327	AT1G60660				1.03339		XLOC_006651	-				1.73663		XLOC_026943	AT5G14070			-1.96656
XLOC_026167	AT4G39838				1.02734		XLOC_009026	AT2G07708				1.68635		XLOC_005392	AT1G19550,AT1G19570			-1.95371
XLOC_012140	AT2G14260,AT2G14285				1.02162		XLOC_012695	AT2G23600,AT2G23610				1.63979		XLOC_032400	AT5G44110			-1.91879
XLOC_022648	AT4G22666				1.0166		XLOC_004197	AT1G78020				1.61953		XLOC_028592	AT5G43150			-1.79115
XLOC_018772	AT3G21550				1.01584		XLOC_029847	AT5G64850				1.58458		XLOC_026805	AT5G11160			-1.77423
XLOC_018279	AT3G12965				1.01345		XLOC_009636	AT2G18800				1.5495		XLOC_026176	AT4G40010,AT4G40011			-1.76895
XLOC_003231	AT1G61224,AT1G61226				1.01146		XLOC_002429	AT1G47395				1.46688		XLOC_031211	AT5G24030			-1.73513
XLOC_001086	AT1G20140				1.00781		XLOC_030277	AT5G05790				1.4116		XLOC_018828	AT3G22540			-1.73417
XLOC_008632	AT2G02510				1.00643		XLOC_009337	AT2G14247				1.39971		XLOC_004689	AT1G07090			-1.70282
XLOC_014122	AT2G47930				1.00212		XLOC_030073	AT5G02150				1.38869		XLOC_015720	AT3G26830			-1.69269
XLOC_001667	AT1G30360				-1.00333		XLOC_008189	AT1G75730				1.34085		XLOC_008610	AT2G02130			-1.68498
XLOC_007265	AT1G59760				-1.00371		XLOC_010443	AT2G32190				1.32586		XLOC_023507	AT4G37730			-1.66982
XLOC_001697	AT1G30760				-1.0079		XLOC_025406	AT4G26320				1.32469		XLOC_010360	AT2G30890,AT2G30900			-1.65752
XLOC_018290	AT3G13070,AT3G13080				-1.0085		XLOC_015108	AT3G17160				1.31957		XLOC_016823	AT3G50300			-1.64629
XLOC_005917	AT1G29640				-1.00931		XLOC_007328	AT1G60680				1.31452		XLOC_033243	AT5G58900			-1.63866
XLOC_021999	AT4G12460				-1.01035		XLOC_000621	AT1G12080				1.19271		XLOC_008693	AT2G03505			-1.55593
XLOC_025421	AT4G26540				-1.0119		XLOC_020434	AT3G53980				1.17897		XLOC_019009	AT3G25717			-1.54072
XLOC_033139	AT5G56980				-1.02233		XLOC_007662	AT1G66140				1.08357		XLOC_000715	AT1G13620			-1.54007
XLOC_007429	AT1G62180				-1.02273		XLOC_008608	AT2G02100				1.04099		XLOC_013975	AT2G45220			-1.48562
XLOC_022995	AT4G28720				-1.02533		XLOC_032381	AT5G43780				1.03205		XLOC_030859	AT5G17230			-1.47532
XLOC_001670	AT1G30400				-1.02544		XLOC_008468	AT1G80830				-1.01391		XLOC_025830	AT4G33770			-1.45971
XLOC_017784	AT3G04480				-1.03066		XLOC_018947	AT3G24450				-1.01873		XLOC_015618	AT3G25190			-1.45917
XLOC_022942	AT4G27870				-1.03537		XLOC_020172	AT3G49601				-1.02282		XLOC_023332	AT4G34680			-1.43261
XLOC_017934	AT3G66658				-1.03678		XLOC_005528	AT1G21920				-1.02605		XLOC_017588	AT3G01260			-1.42575
XLOC_001972	AT1G35115.1				-1.03696		XLOC_026997	AT5G15130				-1.0365		XLOC_020443	AT3G54140			-1.41724
XLOC_019199	AT3G28340				-1.04459		XLOC_018601	AT3G18490				-1.05543		XLOC_003652	AT1G68238			-1.39414
XLOC_032649	AT5G48150				-1.04933		XLOC_030749	AT5G15150				-1.07941		XLOC_004143	AT1G76990			-1.37806
XLOC_026561	AT5G06270				-1.05102		XLOC_011158	AT2G44490				-1.09631		XLOC_019426	AT3G30775			-1.36379
XLOC_010419	AT2G31820				-1.05122		XLOC_016548	AT3G45640				-1.09635		XLOC_014940	AT3G14560			-1.34411
XLOC_015663	AT3G25890				-1.05353		XLOC_005109	AT1G14330				-1.10681		XLOC_013184	AT2G31570			-1.3425
XLOC_004402	AT1G01960				-1.05373		XLOC_006971	AT1G53170				-1.10971		XLOC_030077	AT5G02270			-1.33755
XLOC_011102	AT2G43535				-1.05546		XLOC_033522	AT5G63790				-1.11557		XLOC_021710	AT4G08290			-1.32039
XLOC_020021	AT3G47000,AT3G47010				-1.05907		XLOC_001598	AT1G29280				-1.13929		XLOC_015546	AT3G23805			-1.29187
XLOC_010049	AT2G25250				-1.06317		XLOC_024723	AT4G14716,AT4G14720				-1.14104		XLOC_011290	AT2G46690			-1.2865
XLOC_022367	AT4G18160				-1.06342		XLOC_023619	AT4G39955				-1.15477		XLOC_020082	AT3G48100			-1.26971
XLOC_028856	AT5G47480				-1.06464		XLOC_014585	AT3G07990				-1.1806		XLOC_012363	AT2G17820			-1.23092
XLOC_016557	AT3G45730,AT3G45740				-1.06717		XLOC_001206	AT1G22190				-1.18904		XLOC_032394	AT5G44005			-1.22743
XLOC_032377	AT5G43745				-1.06915		XLOC_002354	AT1G44810				-1.19		XLOC_010230	AT2G28410			-1.21921
XLOC_004335	AT1G80770				-1.07242		XLOC_005378	AT1G19310				-1.20086		XLOC_027463	AT5G24165			-1.2138
XLOC_001112	AT1G20620,AT1G20630				-1.08728		XLOC_025863	AT4G34180				-1.20956		XLOC_015540	AT3G23730			-1.21232
XLOC_015584	AT3G24520				-1.0915		XLOC_004113	AT1G76520				-1.21373		XLOC_010874	AT2G39705			-1.18936
XLOC_008170	AT1G75370				-1.09275		XLOC_003643	AT1G68150				-1.21595		XLOC_001801	AT1G32460			-1.18878
XLOC_026283	AT5G01620				-1.1017		XLOC_031026	AT5G20040,AT5G20045				-1.27821		XLOC_021845	AT4G09890			-1.18088
XLOC_032815	AT5G50920				-1.10692		XLOC_007471	AT1G62810				-1.31224		XLOC_026359	AT5G02840			-1.17214
XLOC_033509	AT5G63595,AT5G63600				-1.11753		XLOC_026629	AT5G07440				-1.32338		XLOC_005161	AT1G15100			-1.16866
XLOC_009593	AT2G18090,AT2G18100				-1.12027		XLOC_001314	AT1G24240				-1.32382		XLOC_029014	AT5G50200			-1.16151
XLOC_011303	AT2G46850				-1.12301		XLOC_032649	AT5G48150				-1.34455		XLOC_006996	AT1G53520			-1.15315
XLOC_012300	AT2G16720				-1.12418		XLOC_000108	AT1G02850				-1.35183		XLOC_024801	AT4G15990			-1.15072
XLOC_003456	AT1G64840				-1.13562		XLOC_026324	AT5G02260				-1.38297		XLOC_015131	AT3G17580			-1.1477
XLOC_026120	AT4G39040				-1.13607		XLOC_009438	AT2G15480,AT2G15490				-1.38532		XLOC_015195	AT3G18560			-1.14626
XLOC_022450	AT4G19450				-1.13805		XLOC_015474	AT3G22890				-1.38778		XLOC_028717	AT5G45100			-1.14329
XLOC_007125	AT1G55740				-1.13851		XLOC_007438	AT1G62300,AT1G62305				-1.40684		XLOC_010377	AT2G31081			-1.13496
XLOC_004573	AT1G05010				-1.14227		XLOC_027576	AT5G26290				-1.44443		XLOC_033116	AT5G56550			-1.11698
XLOC_018654	AT3G19430				-1.14695		XLOC_027538	AT5G25460				-1.46049		XLOC_008352	AT1G78520			-1.11183
XLOC_025707	AT4G31670				-1.14997		XLOC_018573	AT3G17940				-1.4655		XLOC_030135	AT5G03380			-1.11071
XLOC_020194	AT3G50010				-1.16395		XLOC_001522	AT1G28130				-1.50394		XLOC_004002	AT1G74458			-1.10723
XLOC_007740	AT1G67310				-1.16533		XLOC_015805	AT3G28200				-1.50715		XLOC_013658	AT2G39700			-1.10004
XLOC_022714	AT4G23980				-1.16994		XLOC_013343	AT2G34340				-1.56473		XLOC_025607	AT4G29905			-1.09682
XLOC_028358	AT5G39500				-1.17173		XLOC_009506	AT2G16700				-1.56753		XLOC_001199	AT1G22065			-1.08802
XLOC_009823	AT2G21850				-1.17456		XLOC_012887	AT2G26690				-1.57271		XLOC_018899	AT3G23810			-1.07321
XLOC_025501	AT4G27830				-1.1793		XLOC_023741	AT4G01700				-1.58729		XLOC_022071	AT4G13710			-1.07077
XLOC_015558	AT3G24000				-1.18981		XLOC_017639	AT3G02040				-1.63249		XLOC_026740	AT5G09960			-1.06979
XLOC_025028	AT4G19440				-1.19467		XLOC_017165	AT3G55980				-1.635		XLOC_033253	AT5G59080			-1.0513
XLOC_005109	AT1G14330				-1.20294		XLOC_002503	AT1G48330				-1.63611		XLOC_000427	AT1G08830			-1.03174
XLOC_018261	AT3G12590				-1.20311		XLOC_033547	AT5G64170				-1.65306		XLOC_028426	AT5G40730			-1.02442
XLOC_001297	AT1G23870,AT1G23880				-1.20384		XLOC_018434	AT3G15340				-1.67196		XLOC_012605	AT2G21970			-1.01657
XLOC_025795	AT4G33120				-1.20579		XLOC_031850	AT5G35735				-1.67501		XLOC_000497	AT1G10070	2.23272	1.16356	1.80966	1.59057
XLOC_006799	AT1G50200				-1.20836		XLOC_027409	AT5G23210				-1.7012		XLOC_004852	AT1G09932	1.7062	1.19116	1.48659	1.41777
XLOC_028175	AT5G36250				-1.20992		XLOC_026120	AT4G39040				-1.72256		XLOC_010963	AT2G41100	3.3501	1.66219	3.51687	1.50511
XLOC_008245	AT1G76710				-1.21042		XLOC_007881	AT1G69810				-1.72704
XLOC_008333	AT1G78240				-1.2116		XLOC_019227	AT3G28740				-1.7565		XLOC_019820	AT3G44260	3.06942	-2.2838	2.39364	-1.60227
XLOC_025861	AT4G34135				-1.22059		XLOC_000743	AT1G14080				-1.8035		XLOC_004026	AT1G74930	2.22997	-4.46867	1.42841	-3.65914
XLOC_010207	AT2G28120				-1.22262		XLOC_000430	AT1G08890,AT1G08900				-1.81089
XLOC_029578	AT5G59930				-1.22953		XLOC_004118	AT1G76590				-1.83045		XLOC_020907	AT3G62040	-1.62088	-2.75501	-4.05735
XLOC_026323	AT5G02250				-1.23012		XLOC_022377	AT4G18280				-1.8327		XLOC_002578	AT1G49570	3.03952	2.32813	4.46295
XLOC_007471	AT1G62810				-1.23115		XLOC_014090	AT2G47260				-1.83387
XLOC_033065	AT5G55600				-1.23232		XLOC_013658	AT2G39700				-1.84089		XLOC_010816	AT2G38530	3.88837	-1.35454	2.85859
XLOC_010930	AT2G40540				-1.23399		XLOC_013213	AT2G32030				-1.84667		XLOC_020290	AT3G51600	5.02376	-1.83227	3.22251
XLOC_003113	AT1G58230				-1.23596		XLOC_024589	AT4G13180				-1.85094		XLOC_029570	AT5G59820	2.06915	-1.21003	1.25597
XLOC_020389	AT3G53160,AT3G53170				-1.23702		XLOC_021162	AT4G01750				-1.85712
XLOC_020401	AT3G53370				-1.24117		XLOC_021265	AT4G03420				-1.87838		XLOC_000977	AT1G18300	2.15751	-2.14856		-1.0699
XLOC_019227	AT3G28740				-1.24196		XLOC_033178	AT5G57630				-1.89605		XLOC_008074	AT1G73540	1.52557	-2.09534		-1.40338
XLOC_007756	AT1G67580				-1.24331		XLOC_005771	AT1G26800				-1.90563		XLOC_022000	AT4G12545,AT4G12550	1.32061	-3.49735		-1.92659
XLOC_023152	AT4G31530				-1.24755		XLOC_021056	AT4G00080				-1.91778
XLOC_011686	AT2G05920				-1.24807		XLOC_018470	AT3G15950				-1.93733		XLOC_004457	AT1G02930	3.04589		2.37948	1.03995
XLOC_018603	AT3G18524				-1.254		XLOC_012848	AT2G25980				-1.99164		XLOC_012381	AT2G18150	2.90295		2.32689	1.16475
XLOC_020582	AT3G56690				-1.25766		XLOC_008340	AT1G78340				-2.03011		XLOC_014951	AT3G14680	1.65394		1.11022	1.15468
XLOC_026828	AT5G11580				-1.26283		XLOC_023349	AT4G34970				-2.03198		XLOC_025629	AT4G30270	2.24943		1.34424	1.09445
XLOC_006613	AT1G45249				-1.27011		XLOC_004621	AT1G05680				-2.05152		XLOC_025972	AT4G36430	3.51887		2.67964	1.22484
XLOC_010918	AT2G40400				-1.27219		XLOC_028410	AT5G40510				-2.06946		XLOC_026996	AT5G15120	2.02647		1.56466	1.09931
XLOC_027205	AT5G18860				-1.27502		XLOC_018932	AT3G24300				-2.15932
XLOC_010119	AT2G26370				-1.27904		XLOC_015103	AT3G17110				-2.21818		XLOC_008831	AT2G05510		4.7924	2.67213	2.2423
XLOC_020160	AT3G49400				-1.28276		XLOC_001695	AT1G30720,AT1G30730,AT1G30740				-2.29589		XLOC_009466	AT2G15960		1.76066	2.41373	1.34513
XLOC_016769	AT3G49220				-1.28516		XLOC_032420	AT5G44380				-2.3063		XLOC_009719	AT2G20142,AT2G20150		2.16576	2.84205	1.44592
XLOC_030813	AT5G16370				-1.28597		XLOC_007921	AT1G70420				-2.33914		XLOC_023145	AT4G31380		1.73924	2.98787	1.15235
XLOC_018570	AT3G17845,AT3G17850				-1.29074		XLOC_007997	AT1G72070				-2.3412		XLOC_024486	AT4G11650		2.70583	1.33272	1.20141
XLOC_018948	AT3G24460				-1.29414		XLOC_017336	AT3G59220				-2.676		XLOC_016717	AT3G48340		-3.02113	-1.81856	-2.56886
XLOC_015531	AT3G23630				-1.2949		XLOC_024766	AT4G15370				-2.748
XLOC_014391	AT3G04605.1				-1.31847		XLOC_001599	AT1G29290				-2.76222		XLOC_008825	AT2G05440		2.2434	-1.22042	2.22169
XLOC_009155	AT2G11270				-1.32574		XLOC_030341	AT5G07000				-2.77453		XLOC_018156	AT3G10930		-2.15492	1.76446	-1.36268
XLOC_006760	AT1G49540				-1.32916		XLOC_013889	AT2G43590				-2.81225
XLOC_003366	AT1G63440,AT1G63450				-1.33008		XLOC_021164	AT4G01770				-2.96337
XLOC_019774	AT3G43720				-1.33175		XLOC_004380	AT1G01470				-2.96357
XLOC_009529	AT2G17033,AT2G17036				-1.33991		XLOC_027118	AT5G17350				-3.02376
XLOC_001683	AT1G30570				-1.34197		XLOC_005373	AT1G19210,AT1G19220				-3.07578
XLOC_021916	AT4G11110				-1.345		XLOC_018784	AT3G21720				-3.15313
XLOC_018467	AT3G15920				-1.34718		XLOC_007160	AT1G56300				-3.17642
XLOC_004721	AT1G07670				-1.34831		XLOC_027445	AT5G23840				-3.19426
XLOC_009602	AT2G18280				-1.35015		XLOC_033283	AT5G59540				-3.25903
XLOC_033098	AT5G56240				-1.35649		XLOC_013892	AT2G43620				-3.30827
XLOC_000977	AT1G18300				-1.36774		XLOC_006649	AT1G47510				-4.36158
XLOC_015653	AT3G25730,AT3G25740				-1.37983		XLOC_014037	AT2G46340				-4.70044
XLOC_006511	AT1G43245				-1.38168		XLOC_024872	AT4G16960				-4.8936
XLOC_033576	AT5G64660				-1.39613		XLOC_031267	AT5G24850				-5.13687
XLOC_003624	AT1G67840				-1.39799		XLOC_004456	AT1G02920				-5.39925
XLOC_022452	AT4G19490				-1.41263		XLOC_010015	AT2G24750,AT2G24760.1				-5.67846
XLOC_018675	AT3G19830				-1.41598		XLOC_014207	AT3G01345				-5.98996
XLOC_014952	AT3G14690				-1.42213		XLOC_007316	AT1G60505				-7.55671
XLOC_030725	AT5G14590				-1.42782		XLOC_032707	AT5G49080.1		3.99887	3.73478
XLOC_013630	AT2G39280				-1.43325		XLOC_003337	AT1G62980		3.33574	3.66255
XLOC_025076	AT4G20210				-1.44015		XLOC_027374	AT5G22555		3.08846	4.62696
XLOC_027409	AT5G23210				-1.45162		XLOC_029446	AT5G57625		2.38313	3.36427
XLOC_006606	AT1G45160				-1.46418		XLOC_022648	AT4G22666		2.33093	2.8498
XLOC_022941	AT4G27850,AT4G27860				-1.47228		XLOC_032189	AT5G40590		2.24701	1.89475
XLOC_026935	AT5G13960				-1.48032		XLOC_031171	AT5G23220		1.96235	1.20444
XLOC_007622	AT1G65520,AT1G65540				-1.48513		XLOC_018769	AT3G21510		1.95139	2.1552
XLOC_027188	AT5G18640				-1.48858		XLOC_000831	AT1G15640		1.94706	1.61396
XLOC_002334	AT1G44050				-1.48964		XLOC_013646	AT2G39518		1.903	2.1405
XLOC_004502	AT1G03830				-1.50716		XLOC_003590	AT1G67330		1.81594	1.9894
XLOC_017463	AT3G61320				-1.5192		XLOC_014882	AT3G13650		1.78622	2.76333
XLOC_005514	AT1G21590				-1.53267		XLOC_018871	AT3G23175		1.77158	1.65827
XLOC_032298	AT5G42590				-1.54055		XLOC_027230	AT5G19230		1.7255	1.96485
XLOC_015850	AT3G28910				-1.55081		XLOC_015500	AT3G23190		1.58766	1.68041
XLOC_012993	AT2G28450				-1.56895		XLOC_014257	AT3G02240		1.57746	3.15683
XLOC_011251	AT2G46150				-1.58004		XLOC_001070	AT1G19960		1.57344	2.01121
XLOC_012401	AT2G18450				-1.60395		XLOC_003923	AT1G72890,AT1G72900		1.52416	1.44625
XLOC_024819	AT4G16250				-1.61942		XLOC_006912	AT1G52200		1.51499	2.37049
XLOC_004106	AT1G76350				-1.63573		XLOC_015195	AT3G18560		1.5126	1.55983
XLOC_012486	AT2G20050				-1.67278		XLOC_017590	AT3G01290		1.49828	2.28942
XLOC_018784	AT3G21720				-1.6765		XLOC_032439	AT5G44610		1.453	2.33721
XLOC_007576	AT1G64700				-1.67674		XLOC_011416	AT2G01540		1.45152	2.23619
XLOC_009341	AT2G14255				-1.68348		XLOC_019066	AT3G26510		1.44714	1.57566
XLOC_013260	AT2G32970				-1.70372		XLOC_012871	AT2G26400		1.39031	1.63017
XLOC_020991	AT3G63320,AT3G63340				-1.71296		XLOC_022742	AT4G24310		1.36976	1.59065
XLOC_011511	AT2G03240				-1.71916		XLOC_025630	AT4G30280		1.3642	2.02652
XLOC_024586	AT4G13120.1				-1.7207		XLOC_027000	AT5G15180		1.35717	2.36386
XLOC_026284	AT5G01670				-1.73696		XLOC_008284	AT1G77330		1.33953	1.04902
XLOC_006649	AT1G47510				-1.73769		XLOC_012300	AT2G16720		1.33441	1.38371
XLOC_015928	AT3G29770				-1.74135		XLOC_019068	AT3G26520		1.31597	1.85399
XLOC_023531	AT4G38280,AT4G38290,AT4G38330				-1.75159		XLOC_015307	AT3G20380		1.2608	2.00447
XLOC_007650	AT1G65950				-1.79127		XLOC_008219	AT1G76240		1.1648	1.18892
XLOC_004528	AT1G04310				-1.80033		XLOC_004454	AT1G02900		1.15431	2.64003
XLOC_030724	AT5G14570,AT5G14580				-1.80819		XLOC_014340	AT3G03780		-2.21844	-1.10043
XLOC_019307	AT3G29575				-1.82438		XLOC_009467	AT2G15970		5.32798		-5.5257
XLOC_012664	AT2G23100				-1.83337		XLOC_005822	AT1G27720,AT1G27730		4.63965		-3.74069
XLOC_019621	AT3G41762				-1.85319		XLOC_004026	AT1G74930		4.30667		-5.84623
XLOC_010614	AT2G35050				-1.85741		XLOC_018156	AT3G10930		3.58964		-3.48451
XLOC_020680	AT3G58350				-1.88308		XLOC_031134	AT5G22570		3.14681		-2.32783
XLOC_006033	AT1G31600				-1.88692		XLOC_024820	AT4G16260		3.08017		-3.17117
XLOC_021932	AT4G11280				-1.89545		XLOC_031352	AT5G26340		3.07092		-4.2034
XLOC_015523	AT3G23470,AT3G23480,AT3G23510,AT3G23530				-1.94967		XLOC_010069	AT2G25510		2.90518		-2.25528
XLOC_007547	AT1G64110				-1.98396		XLOC_004614	AT1G05575,AT1G05577		2.75284		-1.91312
XLOC_017938	AT3G06690				-1.99179		XLOC_024486	AT4G11650		2.75019		-1.54152
XLOC_007345	AT1G60930				-2.01891		XLOC_021932	AT4G11280		2.67321		-2.00972
XLOC_028524	AT5G42250				-2.03219		XLOC_003924	AT1G72910,AT1G72920,AT1G72930,AT1G72940		2.66935		-2.26716
XLOC_005822	AT1G27720,AT1G27730				-2.0508		XLOC_008074	AT1G73540		2.60441		-2.6231
XLOC_005012	AT1G12620				-2.06737		XLOC_029266	AT5G54490		2.55076		-2.14421
XLOC_032366	AT5G43520				-2.13321		XLOC_032146	AT5G40000		2.45619		-2.43291
XLOC_022026	AT4G13030				-2.13703		XLOC_012658	AT2G23030		2.42582		-2.12263
XLOC_005444	AT1G20480,AT1G20490				-2.13859		XLOC_011333	AT2G47400		2.40467		-1.69402
XLOC_014070	AT2G46950				-2.16811		XLOC_004119	AT1G76600		2.36013		-2.85689
XLOC_022454	AT4G19510				-2.16939		XLOC_015374	AT3G21351		2.35653		-3.31777
XLOC_032997	AT5G54380				-2.19289		XLOC_013678	AT2G40000		2.34992		-2.34047
XLOC_007116	AT1G55610				-2.20893		XLOC_003239	AT1G61340		2.31332		-2.20989
XLOC_027502	AT5G24930				-2.25014		XLOC_019199	AT3G28340		2.27333		-1.0647
XLOC_011178	AT2G44840				-2.30536		XLOC_018067	AT3G09390		2.26072		-2.36167
XLOC_005904	AT1G29357,AT1G29370				-2.57597		XLOC_007686	AT1G66500		2.25288		-4.58641
XLOC_005373	AT1G19210,AT1G19220				-2.74041		XLOC_016818	AT3G50260		2.22052		-1.42027
XLOC_002935	AT1G55700				-2.80691		XLOC_030342	AT5G07010		2.19815		-2.57803
XLOC_006718	AT1G48690				-2.824		XLOC_008240	AT1G76600		2.19473		-2.90093
XLOC_008835	AT2G05540				-2.91444		XLOC_030636	AT5G13080		2.15439		-2.35292
XLOC_022453	AT4G19500				-2.91814		XLOC_030872	AT5G17460		2.1231		-1.79491
XLOC_016544	AT3G45577				-2.97739		XLOC_023486	AT4G37410		2.11533		-3.01792
XLOC_003356	AT1G63230				-3.00906		XLOC_023103	AT4G30650		2.09266		-1.28953
XLOC_032286	AT5G42380				-3.02411		XLOC_002603	AT1G50060		2.07067		-2.19673
XLOC_012676	AT2G23330.1				-3.28819		XLOC_010812	AT2G38470		2.01776		-1.91014
XLOC_014853	AT3G13240				-3.32041		XLOC_010840	AT2G38940		1.89451		-2.08798
XLOC_009608	AT2G18370				-3.48026		XLOC_001031	AT1G19180		1.89426		-1.57597
XLOC_008833	AT2G05520				-3.59934		XLOC_005917	AT1G29640		1.89407		-2.63383
XLOC_033543	AT5G64120				-3.70105		XLOC_001286	AT1G23710		1.89388		-2.23972
XLOC_032369	AT5G43580				-3.79542		XLOC_003617	AT1G67750		1.72671		-3.22098
XLOC_019507	AT3G32030				-3.9517		XLOC_024591	AT4G13195		1.62404		-2.53326
XLOC_008548	AT2G01008				-4.00181		XLOC_012989	AT2G28400		1.59932		-1.15611
XLOC_024872	AT4G16960				-4.47075		XLOC_005789	AT1G27100		1.52373		-1.55335
XLOC_032472	AT5G45220				-5.80606		XLOC_000959	AT1G17860		1.51321		-1.4316
XLOC_019176	AT3G27990				-8.09111		XLOC_026561	AT5G06270		1.49767		-2.8351
XLOC_001053	AT1G19530		2.17999	1.69058			XLOC_002025	AT1G35720		1.4938		-1.19729
XLOC_004852	AT1G09932		1.48659	1.91524			XLOC_029843	AT5G64790,AT5G64810		1.46108		-1.27125
XLOC_006922	AT1G52342		1.08911	1.39446			XLOC_009490	AT2G16365		1.44897		-1.82742
XLOC_007454	AT1G62510		2.20284	2.86631			XLOC_024902	AT4G17486,AT4G17490		1.43964		-1.61444
XLOC_009896	AT2G22860		1.55672	1.40953			XLOC_017216	AT3G56880		1.3585		-1.13176
XLOC_012658	AT2G23030		1.91435	1.87646			XLOC_023713	AT4G01250		1.33984		-2.17262
XLOC_013912	AT2G43920		3.18763	2.51147			XLOC_015626	AT3G25250		1.32172		-1.82457
XLOC_015824	AT3G28510		4.05231	3.22561			XLOC_007409	AT1G61890		1.27067		-1.70204
XLOC_018238	AT3G12230,AT3G12240		2.32488	1.19917			XLOC_013443	AT2G36080		1.24504		-1.10173
XLOC_022940	-		3.7198	2.11393			XLOC_030425	AT5G08730,AT5G08790		1.24283		-1.3058
XLOC_025629	AT4G30270		1.34424	1.67008			XLOC_014549	AT3G07390		1.22712		-1.48394
XLOC_025792	AT4G33070		1.37463	1.76751			XLOC_004573	AT1G05010		1.19355		-2.69245
XLOC_025853	AT4G33980		1.81372	1.8193			XLOC_016450	AT3G44300		1.14542		-1.72291
XLOC_026758	AT5G10210		1.67001	1.30686			XLOC_024999	AT4G19030		1.13477		-1.26135
XLOC_031171	AT5G23220		1.93948	1.31472			XLOC_027169	AT5G18310		1.13287		-1.13257
XLOC_011302	AT2G46830		-4.33622	-3.28946			XLOC_021730	AT4G08555		1.12789		-1.12848
XLOC_013731	AT2G40900		-2.00345	-1.41259			XLOC_017636	AT3G01970,AT3G01980		1.08986		-1.38752
XLOC_015132	AT3G17609,AT3G17611		-2.92685	-2.46711			XLOC_007000	AT1G53580		1.06598		-1.0732
XLOC_018899	AT3G23810		-1.07321	-2.15058			XLOC_029449	AT5G57660		1.05948		-1.86934
XLOC_026504	AT5G05270		-2.65591	-2.33491			XLOC_019974	AT3G46280		1.02998		-1.3199
XLOC_030864	AT5G17300		-3.67262	-3.07708			XLOC_028375	AT5G39850		1.00772		-2.4203
XLOC_031969	AT5G37260		-2.38914	-1.94064			XLOC_018105	AT3G10080		-1.19773		1.59775
XLOC_032400	AT5G44110		-1.91879	-1.73133			XLOC_006587	AT1G44800		-1.39379		1.26509
XLOC_000497	AT1G10070		1.80966		-1.36221		XLOC_002528	AT1G48750		-1.4294		2.42842
XLOC_001031	AT1G19180		1.32268		-1.06141		XLOC_033336	AT5G60490		-1.47187		2.14602
XLOC_001172	AT1G21680		1.44137		-1.32026		XLOC_018007	AT3G08040		-1.59316		1.7493
XLOC_005426	AT1G20160		1.4848		-1.16427		XLOC_024983	AT4G18780		-1.76755		1.47144
XLOC_008071	AT1G73500		1.00985		-1.39139		XLOC_031969	AT5G37260		-2.28386		2.01509
XLOC_008831	AT2G05510		2.67213		-1.87144		XLOC_005740	AT1G26250			3.8909	4.14588
XLOC_012381	AT2G18150		2.32689		-2.10732		XLOC_010332	AT2G30230			2.86622	2.73264
XLOC_013754	AT2G41290		1.52467		-1.3224		XLOC_016598	AT3G46480			2.45754	3.45814
XLOC_014417	AT3G05155		1.02354		-1.23228		XLOC_025022	AT4G19370			2.31207	2.23206
XLOC_014951	AT3G14680		1.11022		-1.25897		XLOC_007666	AT1G66173			1.79208	2.0085
XLOC_016601	AT3G46490,AT3G46500		1.05694		-1.0629		XLOC_033508	AT5G63590			1.60349	2.25106
XLOC_016864	AT3G50930		1.56869		-1.62855		XLOC_030356	AT5G07322			1.35979	1.2007
XLOC_017389	AT3G60140		1.87045		-3.12971		XLOC_003582	AT1G67150			1.3361	1.77391
XLOC_018389	AT3G14440		1.40868		-3.63814		XLOC_005600	AT1G23205			1.20482	1.43456
XLOC_019997	AT3G46620		1.13018		-1.43268		XLOC_000560	AT1G11185			1.15996	1.24055
XLOC_020011	AT3G46810		2.12804		-2.09374		XLOC_011102	AT2G43535			-1.04984	-1.81319
XLOC_020042	AT3G47340		1.89819		-2.69435		XLOC_000914	AT1G17180			-1.32747	-1.99915
XLOC_020108	AT3G48520		2.12687		-1.51338		XLOC_022689	AT4G23590			-1.44746	-1.72117
XLOC_020290	AT3G51600		3.22251		-2.57782		XLOC_008833	AT2G05520		3.87627
XLOC_020444	AT3G54150		2.12926		-2.61505		XLOC_011345	AT2G47540		3.69313
XLOC_020545	AT3G55970		3.57601		-2.32365		XLOC_019820	AT3G44260		3.19047
XLOC_021164	AT4G01770		1.13624		-2.16729		XLOC_020584	AT3G56710		2.99352
XLOC_021265	AT4G03420		1.22152		-1.20412		XLOC_030307	AT5G06320		2.72195
XLOC_022441	AT4G19230		1.63311		-1.18733		XLOC_026758	AT5G10210		2.34858
XLOC_022689	AT4G23590		1.17475		-1.3835		XLOC_004422	AT1G02360		2.06971
XLOC_022817	AT4G25810		1.1457		-1.16178		XLOC_021154	AT4G01630		2.036
XLOC_023617	AT4G39950		1.01651		-1.51488		XLOC_025720	AT4G31875		2.02653
XLOC_024664	AT4G14030,AT4G14040		1.03004		-1.45251		XLOC_029850	AT5G64890		2.00837
XLOC_025264	AT4G23510		1.08023		-1.77583		XLOC_002578	AT1G49570		1.89977
XLOC_025696	AT4G31500		1.0224		-1.16607		XLOC_020120	AT3G48690		1.87885
XLOC_026972	AT5G14730		1.40274		-1.10053		XLOC_012549	AT2G21020		1.74796
XLOC_027141	AT5G17847,AT5G17850		1.92875		-1.42477		XLOC_004619	AT1G05650,AT1G05660		1.72277
XLOC_028153	AT5G35940		2.45476		-3.1672		XLOC_013740	AT2G41010		1.68753
XLOC_028341	AT5G39050		2.76268		-2.06766		XLOC_011340	AT2G47485		1.63002
XLOC_029570	AT5G59820		1.25597		-1.31334		XLOC_030108	AT5G02810		1.55425
XLOC_030342	AT5G07010		1.30515		-1.92734		XLOC_001831	AT1G32920		1.54968
XLOC_030636	AT5G13080		1.23287		-1.23781		XLOC_019321	-		1.48764
XLOC_031352	AT5G26340		1.47529		-1.61417		XLOC_028456	AT5G41280,AT5G41290		1.47223
XLOC_031447	AT5G28080		1.58575		-1.05408		XLOC_028492	AT5G41800,AT5G41810		1.34697
XLOC_032146	AT5G40000		2.67733		-1.74432		XLOC_028429	AT5G40780		1.33955
XLOC_032420	AT5G44380		1.44185		-1.75652		XLOC_001454	AT1G27030		1.33165
XLOC_000427	AT1G08830		-1.03174		1.34025		XLOC_012525	AT2G20670		1.28829
XLOC_000715	AT1G13620		-1.54007		1.31845		XLOC_005428	AT1G20190		1.17587
XLOC_001245	AT1G22885		-1.12708		1.0928		XLOC_017613	AT3G01472		1.1626
XLOC_002528	AT1G48750		-3.20006		3.07992		XLOC_002831	AT1G54030		1.13425
XLOC_003887	AT1G72230		-1.64252		1.11179		XLOC_012322	AT2G17080		1.1208
XLOC_004383	AT1G01610		-3.00965		3.35782		XLOC_024880	AT4G17100		1.10656
XLOC_005392	AT1G19550,AT1G19570		-1.95371		1.81002		XLOC_018522	AT3G17020		1.07512
XLOC_008610	AT2G02130		-1.68498		2.34342		XLOC_025230	AT4G23010		1.05224
XLOC_008693	AT2G03505		-1.55593		1.45811		XLOC_012523	AT2G20625,AT2G20630		1.03771
XLOC_010377	AT2G31081		-1.13496		1.55092		XLOC_023104	AT4G30660		1.01449
XLOC_011290	AT2G46690		-1.2865		1.42928		XLOC_031995	AT5G37600		1.0087
XLOC_013184	AT2G31570		-1.3425		1.13123		XLOC_024484	AT4G11600,AT4G11610		1.00287
XLOC_013975	AT2G45220		-1.48562		1.18692		XLOC_022917	AT4G27435		-1.03337
XLOC_014940	AT3G14560		-1.34411		1.34065		XLOC_013730	AT2G40890		-1.04662
XLOC_015540	AT3G23730		-1.21232		1.52372		XLOC_010185	AT2G27550		-1.13172
XLOC_018705	AT3G20450		-2.82193		2.31534		XLOC_025897	AT4G34980		-1.14073
XLOC_018814	AT3G22235,AT3G22240		-1.01589		1.53014		XLOC_025804	AT4G33260,AT4G33270		-1.14222
XLOC_018828	AT3G22540		-1.73417		1.85371		XLOC_017237	AT3G57230		-1.15574
XLOC_018881	AT3G23430		-1.59277		1.42089		XLOC_006873	AT1G51680		-1.19935
XLOC_020434	AT3G53980		-1.09747		1.97755		XLOC_032612	AT5G47500		-1.32834
XLOC_022624	AT4G22214		-3.18719		2.56387		XLOC_001126	AT1G20823		-1.33485
XLOC_022917	AT4G27435		-1.02914		1.16644		XLOC_001012	AT1G18880		-1.33642
XLOC_023163	AT4G31730		-2.51319		1.11874		XLOC_005377	AT1G19300		-1.34811
XLOC_023332	AT4G34680		-1.43261		1.34457		XLOC_007980	AT1G71692		-1.37189
XLOC_026943	AT5G14070		-1.96656		1.30854		XLOC_026705	AT5G09220		-1.42477
XLOC_027375	AT5G22580		-2.39817		2.00708		XLOC_004459	AT1G02950		-1.44999
XLOC_027463	AT5G24165		-1.2138		1.06254		XLOC_012918	AT2G27140		-1.45474
XLOC_031281	AT5G25090		-2.21625		1.79596		XLOC_001128	AT1G20850		-1.4551
XLOC_033253	AT5G59080		-1.0513		1.94654		XLOC_002571	AT1G49470		-1.60071
XLOC_033336	AT5G60490		-1.45334		1.90708		XLOC_032148	AT5G40020		-1.60482
XLOC_003580	-			1.8179	1.46252		XLOC_011286	AT2G46630		-1.91921
XLOC_003581	AT1G67148			1.32829	1.03236		XLOC_006083	AT1G32450		-1.93769
XLOC_005740	AT1G26250			2.4907	3.47597		XLOC_021134	AT4G01440		-1.95117
XLOC_007075	AT1G54950			3.39009	3.6214		XLOC_027396	AT5G23010,AT5G23020		-1.98752
XLOC_015307	AT3G20380			1.37698	2.17946		XLOC_003120	AT1G58370		-2.04003
XLOC_015493	AT3G23125			2.8591	4.55319		XLOC_021849	AT4G09950		-2.25526
XLOC_018769	AT3G21510			1.85605	1.17185		XLOC_017743	AT3G03770		-2.41057
XLOC_018871	AT3G23175			1.41706	1.03862		XLOC_033150	AT5G57190		-3.0045
XLOC_028379	AT5G39890			1.83922	1.74264		XLOC_026186	AT4G40090			3.99843
XLOC_010087	AT2G25790			-1.20971	-1.44735		XLOC_000048	AT1G01750			3.96231
XLOC_020648	AT3G57880			-1.43794	-1.20121		XLOC_004980	AT1G12040			3.79279
XLOC_000131	AT1G03230		1.15635				XLOC_018597	AT3G18450			3.57922
XLOC_000828	AT1G15610,AT1G15630		1.60051				XLOC_007075	AT1G54950			3.50753
XLOC_001281	AT1G23480		1.01015				XLOC_008778	AT2G04680			3.43259
XLOC_002584	AT1G49720		1.46698				XLOC_014258	AT3G02242			3.43007
XLOC_002896	AT1G55120		1.48834				XLOC_024287	AT4G08400,AT4G08410			3.42434
XLOC_002917	AT1G55430		1.59269				XLOC_032309	AT5G42785			3.42371
XLOC_003637	AT1G68050		1.89249				XLOC_031360	AT5G26660			3.327
XLOC_003764	AT1G70090		1.24501				XLOC_022832	AT4G26010			3.30913
XLOC_003923	AT1G72890,AT1G72900		1.7103				XLOC_020468	AT3G54580			3.25272
XLOC_003924	AT1G72910,AT1G72920,AT1G72930,AT1G72940		1.61853				XLOC_022818	AT4G25820			3.24649
XLOC_004020	AT1G74790		1.18304				XLOC_019973	AT3G46270			3.15762
XLOC_004456	AT1G02920		1.95283				XLOC_014159	-			3.0683
XLOC_004457	AT1G02930		2.37948				XLOC_001287	AT1G23720			3.06693
XLOC_004919	AT1G10990		1.10872				XLOC_001708	AT1G30870			3.02392
XLOC_004929	AT1G11190		1.28231				XLOC_007627	AT1G65610			2.8805
XLOC_005077	AT1G13750		1.26099				XLOC_021956	AT4G11655			2.87158
XLOC_005257	AT1G17060		1.18488				XLOC_000830	-			2.84521
XLOC_005570	AT1G22570		2.14544				XLOC_013975	AT2G45220			2.81351
XLOC_005774	AT1G26820		1.113				XLOC_002592	AT1G49860,AT1G49870			2.80023
XLOC_006296	AT1G36060		1.55798				XLOC_031069	AT5G20820			2.79978
XLOC_006573	AT1G44180		1.43989				XLOC_003580	-			2.74422
XLOC_006795	AT1G50090		4.17077				XLOC_017071	AT3G54590			2.73628
XLOC_007031	AT1G54100		1.15226				XLOC_018758	AT3G21340			2.7316
XLOC_007450	AT1G62440		1.92228				XLOC_027254	AT5G19560			2.68724
XLOC_007675	AT1G66280		1.54559				XLOC_024965	AT4G18430			2.68284
XLOC_007885	AT1G69850		1.01355				XLOC_033198	AT5G58010			2.65258
XLOC_007890	AT1G69930		1.69462				XLOC_023777	AT4G02270			2.63008
XLOC_008061	AT1G73260		1.92757				XLOC_029995	AT5G67400			2.62983
XLOC_009438	AT2G15480,AT2G15490		1.1082				XLOC_003172	AT1G60095,AT1G60110,AT1G60130			2.62139
XLOC_009466	AT2G15960		2.41373				XLOC_029803	AT5G64100			2.45226
XLOC_009719	AT2G20142,AT2G20150		2.84205				XLOC_000976	AT1G18290			2.44409
XLOC_010816	AT2G38530		2.85859				XLOC_016594	AT3G46400			2.36663
XLOC_011289	AT2G46685		2.86963				XLOC_020947	AT3G62690			2.35832
XLOC_011570	AT2G04170		1.34641				XLOC_033683	AT5G66480,AT5G66490			2.30398
XLOC_012252	AT2G16060		1.04148				XLOC_019216	AT3G28550			2.30271
XLOC_012817	AT2G25450		1.78235				XLOC_013865	AT2G43150			2.22384
XLOC_013095	AT2G30210		1.00058				XLOC_025042	AT4G19720			2.18497
XLOC_013578	AT2G38290		1.29652				XLOC_009868	AT2G22480			2.16486
XLOC_013625	AT2G39210		1.25484				XLOC_025060	AT4G19920			2.16207
XLOC_014059	AT2G46670,AT2G46680		1.33959				XLOC_000705	AT1G13430			2.07416
XLOC_014324	AT3G03500		1.30435				XLOC_017881	AT3G05920			2.07256
XLOC_014527	AT3G06990,AT3G07000		1.55812				XLOC_033541	AT5G64100			2.04537
XLOC_014549	AT3G07390		1.14641				XLOC_020560	AT3G56230			2.03808
XLOC_014691	AT3G10300		1.2866				XLOC_026009	AT4G37070			2.03539
XLOC_014702	AT3G10450		1.8312				XLOC_005099	AT1G14170			2.01331
XLOC_014947	AT3G14620		2.5582				XLOC_022728	AT4G24130			1.98416
XLOC_015008	AT3G15500		2.16483				XLOC_007743	AT1G67328			1.94534
XLOC_015103	AT3G17110		1.84567				XLOC_012629	AT2G22430,AT2G22470,AT2G22490			1.94032
XLOC_015497	AT3G23150		2.7466				XLOC_032822	AT5G51060			1.88923
XLOC_016581	AT3G46190		2.53406				XLOC_021938	AT4G11360			1.87235
XLOC_017348	AT3G59480		1.56518				XLOC_018814	AT3G22235,AT3G22240			1.86467
XLOC_017636	AT3G01970,AT3G01980		1.01927				XLOC_004852	AT1G09932			1.85665
XLOC_018030	AT3G08860		2.44285				XLOC_013851	AT2G42840			1.8127
XLOC_018933	AT3G24310		3.02905				XLOC_006883	AT1G51850			1.78633
XLOC_020569	AT3G56400		1.91129				XLOC_006998	AT1G53560			1.77973
XLOC_021056	AT4G00080		1.30136				XLOC_005593	AT1G23052			1.77761
XLOC_021882	AT4G10500		1.29765				XLOC_021184	AT4G02090			1.75732
XLOC_023122	AT4G31000		1.33947				XLOC_023283	AT4G33960			1.75247
XLOC_023712	AT4G01230,AT4G01240		1.27969				XLOC_011290	AT2G46690			1.74725
XLOC_023713	AT4G01250		1.45699				XLOC_020276	AT3G51330			1.72476
XLOC_023951	AT4G04700		1.3427				XLOC_032355	AT5G43350			1.71183
XLOC_024377	AT4G09780		1.99858				XLOC_018843	AT3G22750			1.70106
XLOC_024591	AT4G13195		1.77453				XLOC_013184	AT2G31570			1.68161
XLOC_024761	AT4G15300		2.40952				XLOC_005398	AT1G19660			1.67918
XLOC_025042	AT4G19720		1.66697				XLOC_004507	AT1G04040			1.63586
XLOC_025396	AT4G26080		1.25146				XLOC_017311	AT3G58710			1.60953
XLOC_025630	AT4G30280		1.06751				XLOC_008003	AT1G72190,AT1G72200			1.60647
XLOC_025972	AT4G36430		2.67964				XLOC_017916	AT3G06420,AT3G06430			1.53635
XLOC_026260	AT5G01210		2.22295				XLOC_022326	AT4G17340			1.5282
XLOC_026709	AT5G09290		1.6426				XLOC_033344	AT5G60660			1.5062
XLOC_028329	AT5G38940		1.59947				XLOC_025652	AT4G30670			1.4875
XLOC_028429	AT5G40780		1.16729				XLOC_018832	AT3G22600			1.46891
XLOC_028718	AT5G45110		1.60234				XLOC_015461	AT3G22620			1.43179
XLOC_028964	AT5G49440		1.00701				XLOC_016797	AT3G49845			1.396
XLOC_029423	AT5G57090		1.16425				XLOC_003261	AT1G61795			1.39057
XLOC_029843	AT5G64790,AT5G64810		1.48334				XLOC_018350	AT3G13910			1.37435
XLOC_030108	AT5G02810		1.02943				XLOC_012934	AT2G27370			1.35229
XLOC_030274	AT5G05730		1.41629				XLOC_030361	AT5G07460			1.35171
XLOC_030891	AT5G17760		2.12327				XLOC_007669	AT1G66200			1.34474
XLOC_031134	AT5G22570		2.23843				XLOC_022068	AT4G13620			1.30965
XLOC_031850	AT5G35735		1.95479				XLOC_001776	AT1G32170			1.29396
XLOC_032052	AT5G38550		1.67061				XLOC_003576	AT1G67105			1.27616
XLOC_032318	AT5G42900		2.14559				XLOC_017609	AT3G01420			1.2659
XLOC_032320	AT5G42920		1.04026				XLOC_017468	AT3G61430			1.25306
XLOC_032527	AT5G46050		1.57239				XLOC_010363	AT2G30930			1.24888
XLOC_033438	AT5G62190		1.10854				XLOC_021137	AT4G01480			1.24669
XLOC_033677	AT5G66390,AT5G66420		1.28399				XLOC_004027	AT1G74940			1.24153
XLOC_000365	AT1G07700		-1.55059				XLOC_017940	AT3G06750			1.23917
XLOC_001640	AT1G29930		-2.5028				XLOC_024876	AT4G17030			1.2345
XLOC_001668	AT1G30380		-3.35517				XLOC_021426	AT4G05150			1.23425
XLOC_001801	AT1G32460		-1.18878				XLOC_030135	AT5G03380			1.19428
XLOC_003235	AT1G61280,AT1G61290		-3.68849				XLOC_022393	AT4G18510			1.19223
XLOC_003652	AT1G68238		-1.39414				XLOC_011200	AT2G45180			1.18999
XLOC_004002	AT1G74458		-1.10723				XLOC_020561	AT3G56240			1.16933
XLOC_004250	AT1G79040		-2.66105				XLOC_012802	AT2G25260			1.16165
XLOC_004635	AT1G06040		-2.40557				XLOC_023463	AT4G36990			1.14481
XLOC_004689	AT1G07090		-1.70282				XLOC_010397	AT2G31350			1.13742
XLOC_005161	AT1G15100		-1.16866				XLOC_029184	AT5G53250			1.10936
XLOC_006996	AT1G53520		-1.15315				XLOC_010720	AT2G36830			1.0718
XLOC_007730	AT1G67195		-4.2512				XLOC_030351	AT5G07220			1.06913
XLOC_008352	AT1G78520		-1.11183				XLOC_026114	AT4G38932			1.06595
XLOC_010230	AT2G28410		-1.21921				XLOC_013972	AT2G45180			1.05057
XLOC_010360	AT2G30890,AT2G30900		-1.65752				XLOC_020235	AT3G50640			1.03257
XLOC_010874	AT2G39705		-1.18936				XLOC_005485	AT1G21190,AT1G21310			1.02396
XLOC_011656	AT2G05620		-2.92857				XLOC_024551	AT4G12520			1.01196
XLOC_012363	AT2G17820		-1.23092				XLOC_005161	AT1G15100			1.01168
XLOC_012605	AT2G21970		-1.01657				XLOC_016971	AT3G52800			1.00271
XLOC_015131	AT3G17580		-1.1477				XLOC_031108	AT5G22090			-1.27456
XLOC_015195	AT3G18560		-1.14626
XLOC_015394	AT3G21710		-1.0812				XLOC_006922	AT1G52342	-2.44354	2.22066	3.14671	-1.52342
XLOC_015546	AT3G23805		-1.29187				XLOC_008575	AT2G01530	-2.2955	1.40355	2.04551	-1.65923
XLOC_015618	AT3G25190		-1.45917				XLOC_012428	AT2G18980	-1.84035	1.20527	1.73465	-1.31364
XLOC_015720	AT3G26830		-1.69269				XLOC_020569	AT3G56400	-1.08329	1.94279	1.61241	-1.4208
XLOC_015876	AT3G29240		-1.13383				XLOC_022000	AT4G12545,AT4G12550	-1.13673	-1.29227	1.29904	1.44973
XLOC_016823	AT3G50300		-1.64629				XLOC_028644	AT5G44020	-1.43299	1.16447	1.53027	-1.07736
XLOC_016880	AT3G51240		-5.07005				XLOC_030399	AT5G08240	-1.63029	1.39779	1.84399	-1.19061
XLOC_017210	AT3G56730		-3.81858				XLOC_033409	AT5G61590,AT5G61600,AT5G61605	-1.25126	1.6027	1.56188	-1.30184
XLOC_017588	AT3G01260		-1.42575				XLOC_033486	AT5G63160	-1.68686	-2.02855	1.28956	1.62289
XLOC_018274	AT3G12830		-1.91834				XLOC_033509	AT5G63595,AT5G63600	-2.45471	1.04036	2.26969	-1.23022
XLOC_018350	AT3G13910		-1.23413				XLOC_004504	AT1G03850	-1.38018	1.16427	2.05157
XLOC_018632	AT3G18990,AT3G19030		-1.66483				XLOC_004983	AT1G12090	-1.20651	1.40585	1.79626
XLOC_019028	AT3G25930		-1.10772				XLOC_005145	AT1G14870	-1.44386	1.20481	2.08613
XLOC_019675	AT3G42658.1		-4.76011				XLOC_009896	AT2G22860	-1.4016	1.22882	2.03815
XLOC_020082	AT3G48100		-1.26971				XLOC_013647	AT2G39530	-1.63566	1.4316	3.00708
XLOC_020443	AT3G54140		-1.41724				XLOC_017584	AT3G01190	-1.04604	1.46722	1.85827
XLOC_020486	AT3G54890		-2.82694				XLOC_023082	AT4G30170	-1.10675	1.11787	1.39012
XLOC_020600	AT3G57020		-2.98602				XLOC_030897	AT5G17820	-1.61516	1.52809	2.89133
XLOC_021710	AT4G08290		-1.32039				XLOC_002878	AT1G54890	-1.71014	1.17931		-3.86003
XLOC_021845	AT4G09890		-1.18088				XLOC_003683	AT1G68840	-1.68769	1.88245		-2.90089
XLOC_022012	AT4G12800		-3.03003				XLOC_006861	AT1G51420	-1.23104	1.07978		-1.35784
XLOC_022071	AT4G13710		-1.07077				XLOC_008071	AT1G73500	-1.7088	1.28677		-2.34047
XLOC_022625	AT4G22217		-2.77948				XLOC_012817	AT2G25450	-2.65886	2.63186		-4.40501
XLOC_023507	AT4G37730		-1.66982				XLOC_018058	AT3G09260	-1.63539	1.48539		-3.64989
XLOC_024801	AT4G15990		-1.15072				XLOC_020290	AT3G51600	3.08554	2.18956		1.47016
XLOC_025078	AT4G20235,AT4G20240		-2.24181				XLOC_026593	AT5G06860	-1.10281	1.44139		-2.49503
XLOC_025196	AT4G22460		-1.78106				XLOC_028282	AT5G38200	-1.41263	1.14783		-2.00117
XLOC_025607	AT4G29905		-1.09682				XLOC_028426	AT5G40730	-3.34756	1.24371		-1.47686
XLOC_025830	AT4G33770		-1.45971				XLOC_028524	AT5G42250	-1.90387	1.53493		-2.37544
XLOC_026176	AT4G40010,AT4G40011		-1.76895				XLOC_003447	AT1G64660	-1.95912		1.15241	-1.16688
XLOC_026359	AT5G02840		-1.17214				XLOC_010377	AT2G31081	1.15948		1.24526	3.38143
XLOC_026740	AT5G09960		-1.06979				XLOC_013910	AT2G43910	-1.78665		1.57852	-1.0616
XLOC_026793	AT5G10970		-3.41199				XLOC_027037	AT5G15830	-1.1359		1.65018	1.17221
XLOC_026805	AT5G11160		-1.77423				XLOC_031100	AT5G21940	-1.9149		1.15551	-1.34244
XLOC_028426	AT5G40730		-1.02442				XLOC_001053	AT1G19530		3.43436	2.81691	-1.84645
XLOC_028717	AT5G45100		-1.14329				XLOC_004109	AT1G76410		1.97118	1.4069	-1.56984
XLOC_029907	AT5G65870		-1.34983				XLOC_006604	AT1G45145		1.32231	1.04367	-1.18009
XLOC_030077	AT5G02270		-1.33755				XLOC_013891	AT2G43610		1.2068	-1.22109	-1.77365
XLOC_030859	AT5G17230		-1.47532				XLOC_025467	AT4G27280		2.53961	1.10742	-1.60939
XLOC_031211	AT5G24030		-1.73513				XLOC_028153	AT5G35940		1.24656	-1.21279	-1.68082
XLOC_032394	AT5G44005		-1.22743				XLOC_029570	AT5G59820		3.28294	2.2366	-2.04509
XLOC_032857	AT5G51795		-2.28128				XLOC_033338	AT5G60530		1.08089	-1.5115	-2.37807
XLOC_033116	AT5G56550		-1.11698
XLOC_033243	AT5G58900		-1.63866
XLOC_033486	AT5G63160		-2.38541
XLOC_001070	AT1G19960			1.10032
XLOC_001708	AT1G30870			2.42716
XLOC_011345	AT2G47540			1.87105
XLOC_013647	AT2G39530			1.20406
XLOC_015500	AT3G23190			1.31204
XLOC_017664	AT3G02550			1.45415
XLOC_022105	AT4G14270			1.1528
XLOC_023208	AT4G32480			1.47627
XLOC_025652	AT4G30670			1.22106
XLOC_000510	AT1G10380			-1.25198
XLOC_000704	AT1G13420			-3.59189
XLOC_003571	AT1G67030			-1.21995
XLOC_015059	AT3G16340			-1.10425
XLOC_017593	AT3G01311			-5.30918
XLOC_022000	AT4G12545,AT4G12550			-1.83129
XLOC_026705	AT5G09220			-1.39872
XLOC_006681	AT1G48070	2.38921	1.45319	1.34517	2.27413
XLOC_027118	AT5G17350	2.61027	2.54878	-2.2075	-2.15083
XLOC_007669	AT1G66200	-2.24317	-1.75496	1.74233	1.24874
XLOC_018156	AT3G10930	2.06318	1.76446		-1.39984
XLOC_028282	AT5G38200	-1.23656	1.03584		-1.62511
XLOC_029974	AT5G66985	-1.32767	-1.89057		1.3637
XLOC_001146	AT1G21140	-1.90896	-2.93216		2.00206
XLOC_018058	AT3G09260	-2.13211		-1.43199	-3.6059
XLOC_002578	AT1G49570	2.13164	4.46295	1.76361
XLOC_012871	AT2G26400	2.12141	4.10686	2.86276
XLOC_024876	AT4G17030	1.82689	3.40081	1.20377
XLOC_028456	AT5G41280,AT5G41290	1.67205	1.97633	1.24924
XLOC_006083	AT1G32450	-1.20757	-2.01891	-1.35918
XLOC_024486	AT4G11650		1.33272	2.52	1.86248
XLOC_026996	AT5G15120		1.56466	1.94919	1.20825
XLOC_027374	AT5G22555		1.24424	2.29334	1.02343
XLOC_004026	AT1G74930		1.42841	-2.33362	-2.77799
XLOC_019820	AT3G44260		2.39364	-2.18474	-2.2826
XLOC_000222	AT1G05000		-2.60526	1.92946	3.12181
XLOC_004355	AT1G01060		-5.84819	-3.61433	1.97451
XLOC_026121	AT4G39070		-1.99561	-1.50288	1.21649
